1     **Genome-Wide Identification of 5-Methylcytosine Sites in Bacterial**  
2     **Genomes By High-Throughput Sequencing of MspJI Restriction**  
3                                     **Fragments**

4

5

6     Brian P. Anton<sup>1\*</sup>, Alexey Fomenkov<sup>1</sup>, Victoria Wu<sup>1,2</sup>, and Richard J. Roberts<sup>1</sup>

7

8     <sup>1</sup> Research Department, New England Biolabs, Ipswich, Massachusetts, United States of America

9     <sup>2</sup> Wellesley College, Wellesley, Massachusetts, United States of America

10

11     \* Corresponding author

12     E-mail: [anton@neb.com](mailto:anton@neb.com) (BPA)

13

14 **ABSTRACT**

15

16 Single-molecule Real-Time (SMRT) sequencing can easily identify sites of N6-methyladenine and  
17 N4-methylcytosine within DNA sequences, but similar identification of 5-methylcytosine sites is not as  
18 straightforward. In prokaryotic DNA, methylation typically occurs within specific sequence contexts,  
19 or motifs, that are a property of the methyltransferases that “write” these epigenetic marks. We  
20 present here a straightforward, cost-effective alternative to both SMRT and bisulfite sequencing for  
21 the determination of prokaryotic 5-methylcytosine methylation motifs. The method, called MFRE-Seq,  
22 relies on excision and isolation of fully methylated fragments of predictable size using MspJI-Family  
23 Restriction Enzymes (MFREs), which depend on the presence of 5-methylcytosine for cleavage. We  
24 demonstrate that MFRE-Seq is compatible with both Illumina and Ion Torrent sequencing platforms  
25 and requires only a digestion step and simple column purification of size-selected digest fragments  
26 prior to standard library preparation procedures. We applied MFRE-Seq to numerous bacterial and  
27 archaeal genomic DNA preparations and successfully confirmed known motifs and identified novel  
28 ones. This method should be a useful complement to existing methodologies for studying prokaryotic  
29 methylomes and characterizing the contributing methyltransferases.

## 30 INTRODUCTION

31

32 DNA can be methylated, that is enzymatically modified with a methyl group, at one of three  
33 common positions on the base, converting cytosine to 5-methylcytosine (m5C) or N4-methylcytosine  
34 (m4C), or adenine to N6-methyladenine (m6A) [reviewed in (1)]. Methylation is directed by DNA  
35 methyltransferases (MTases), each of which catalyzes the formation of one of these three  
36 modifications. To a greater or lesser degree, MTases require additional conserved sequence around  
37 the methylated base for successful DNA binding and catalysis. These short, conserved sequence  
38 elements, often referred to as *motifs* (2), can be deduced by examination of multiple instances of  
39 methylation. The distribution of methylation, structure of MTase motifs, and biological functions of  
40 DNA methylation differ significantly between prokaryotes and eukaryotes.

41 In eukaryotes, DNA methylation is associated with control of gene expression, genomic  
42 imprinting, X-chromosome inactivation, and RNA splicing (3, 4). While it was long believed that m5C  
43 was the only methylated base in eukaryotic DNA, recent studies have confirmed the existence of m6A  
44 as well (5-9). Eukaryotic DNA MTases exhibit little intrinsic sequence specificity around the  
45 methylated base, acting at weakly specific motifs such as CG in mammals, CG, CHG and CHH in  
46 plants (10-12), and VAT in early-branching fungi (8). However, only a subset of bases in these  
47 contexts is actually methylated, since eukaryotic MTases are directed to sites of action by other  
48 proteins, restricted by the accessibility of chromatin in a given region, or intended to maintain an  
49 epigenetic pattern by converting hemi-methylated sites to fully methylated sites following replication.  
50 As a result, in eukaryotes sequence context is only one of several factors that determine whether or  
51 not a particular base is methylated at any given time.

52 In bacteria and archaea, all three types of methylation are common. Unlike in eukaryotes,  
53 where the bulk of DNA methylation activity is intimately linked with chromosome replication,  
54 prokaryotic DNA methylation occurs independently of replication. In prokaryotes, methylation often  
55 occurs as part of restriction-modification (R-M) systems, where it protects the chromosome from the  
56 action of the cognate restriction endonuclease (REase) (1). However, there are also MTases  
57 unaccompanied by REases, so-called orphan or solitary MTases, which can have other biological

58 functions. The most well studied of these are Dam, found in Gammaproteobacteria and involved with  
59 mismatch repair, chromosome replication timing, and gene expression (13); Dcm, found in enteric  
60 bacteria and involved with gene expression and drug resistance (14); and CcrM, found in  
61 Alphaproteobacteria and involved with the regulation of cell cycle and division (15). With the notable  
62 exception of some non-specific phage-encoded MTases, microbial MTases tend to have well-defined  
63 sequence motifs, typically ranging in length from 4 to 8 bases (16). In microbial genomes, in contrast  
64 to those of eukaryotes, most instances of a given motif are methylated, and in fact this fraction often  
65 approaches 100%. Nonetheless, it has been observed that a small number of Dam MTase (GATC)  
66 sites in *Escherichia coli*, *Salmonella bongorii*, and *Photobacterium luminescens* are consistently  
67 unmethylated, suggesting competition between MTases and other DNA binding proteins at these few  
68 loci (17-20).

69 Determination of MTase recognition sites was at one time a very tedious process that  
70 typically involved installing radiolabeled methyl groups, performing partial digestion of methylated  
71 DNA, separating fragments by electrophoresis or chromatography, following the radiolabel, and  
72 reconstructing the motif based on analysis of various radiolabeled digest products [e.g., (21)]. As a  
73 result, motifs of microbial MTases in R-M systems were often assumed to be the same as those of  
74 their cognate REases (for which motifs were significantly easier to determine), as opposed to  
75 determined directly. In recent years, however, the direct determination of MTase motifs has become  
76 significantly easier with the development of several new technologies.

77 Single-molecule real-time (SMRT) sequencing from Pacific Biosciences (PacBio)  
78 revolutionized the study of m6A and m4C MTases when this technology was introduced in 2010 (22).  
79 It was discovered that the polymerase used in this sequencing-by-synthesis method took longer, on  
80 average, to incorporate nucleotides opposite these methylated bases than their unmodified  
81 counterparts. The presence of m6A and m4C could therefore be inferred by a statistically significant  
82 delay in incorporation at a particular locus. The PacBio software environment includes the program  
83 MotifMaker (<https://github.com/PacificBiosciences/MotifMaker>), which extracts a sequence window  
84 around each putative methylated base and uses a branch-and-bound search to identify conserved  
85 motifs within the set. SMRT sequencing has enabled the determination of motifs for hundreds of new

86 m6A and m4C MTases and has been particularly valuable for studying Type I and Type III R-M  
87 systems, for which DNA cleavage patterns cannot be used to deduce binding and methylation motifs  
88 (16).

89 In contrast to m6A and m4C, the SMRT sequencing kinetic signal associated with m5C is  
90 significantly weaker, is diffused among several bases around the methylated site, and tends not to be  
91 on the methylated base itself (23). Although m5C sites can occasionally be detected with sufficiently  
92 high sequence coverage (22, 24, 25) or with hypermodification of the original m5C using TET enzyme  
93 (23, 26), on the whole, SMRT sequencing is less suited to the reliable identification of m5C motifs  
94 than to m4C or m6A. Other methods of analyzing m5C in DNA have been developed, particularly  
95 bisulfite sequencing (27), often considered the “gold standard” of m5C methylation analysis.  
96 Treatment of DNA with sodium bisulfite deaminates unmodified cytosine residues to uracil, while  
97 leaving m5C residues (and to a lesser extent, m4C residues) intact. Comparison of sequence data  
98 from treated and untreated samples enables the distinction of methylated cytosine residues (read as  
99 cytosine in both samples) from unmethylated residues (read as thymine in treated samples and  
100 cytosine in untreated samples). Whole-genome and targeted bisulfite sequencing have been used  
101 successfully to study Dcm modification in *E. coli* (28) and to characterize new m5C methyltransferase  
102 motifs in *Enterococcus faecalis* (29), *Enterococcus faecium* (30), and *Prevotella intermedia* (31). In  
103 most of these cases, the motif was known or suspected based on other lines of evidence such as  
104 SMRT sequencing, but in the case of *E. faecium* the motif was determined *de novo* using MEME (32)  
105 motif searching of windows around cytosines protected from bisulfite conversion (30).

106 While bisulfite sequencing is a powerful technique, it is laborious and can be challenging for  
107 those not experienced with it. A balance must be struck between maximizing C-to-U conversion  
108 (thereby keeping false positives to a minimum) and minimizing the DNA degradation concomitant with  
109 bisulfite treatment. As a result of this damage, relatively large amounts of sample must be used to  
110 achieve coverage sufficient to accurately call unconverted C residues. In addition, data analysis can  
111 be challenging, requiring specialized alignment tools to map bisulfite-converted reads to the reference  
112 sequence.

113           Some techniques have been developed around interrogating m5C sites using Type IV  
114 REases. While “typical” REases cleave unmethylated DNA and are blocked by methylation of the  
115 recognition site, Type IV enzymes cleave only when the recognition site bears a specific methyl group  
116 and do not cleave at unmethylated sites (2). One particularly useful family of Type IV REases is  
117 typified by MspJI (33), and we refer to enzymes of this type as MFREs (MspJI-family REases). All  
118 MFREs recognize highly degenerate motifs bearing m5C (such as CNNR, the recognition site of  
119 MspJI itself), introduce double-strand breaks at a fixed distance 3' to the m5C base, and leave 4-base  
120 5' overhangs. The site of cleavage is therefore indicative of the presence of m5C a fixed distance  
121 away. In addition, a fully methylated site (that is, a typically palindromic recognition site that is  
122 methylated on both strands) will induce double strand breaks on both sides of the site, excising a  
123 DNA fragment with the REase motif centered within it and the methylated bases at predictable  
124 locations.

125           MFREs have been used in diverse applications such as random fragmentation (34),  
126 measuring changes in methylation by qPCR (35), and quantitation of hm5C using hybridization chain  
127 reaction (36). However, the last property above—the excision of fully methylated DNA sites as small  
128 DNA fragments with the methylated bases roughly in the middle—immediately suggested the first  
129 described application of these enzymes, namely mapping fully methylated sites in eukaryotic  
130 genomes at single-base resolution (33, 37, 38). In this work, we have exploited the same property to  
131 characterize the recognition sites of microbial m5C MTases, a technique that we term “MFRE-Seq.”  
132 Because it relies, not on the identification of any specific site, but merely on the collection of a  
133 sufficient number of examples to derive a common sequence signature, it is perhaps an even more  
134 straightforward application of MFREs than the mapping of eukaryotic sites. We present the results of  
135 analyzing numerous microbial genomes and demonstrate MFRE-Seq as a useful and cost-effective  
136 alternative to both bisulfite and SMRT sequencing for characterizing microbial m5C MTases.

137 **MATERIALS AND METHODS**

138

139 **Methyl-dependent digestion of DNA.**

140 In a typical reaction, 1 µg of genomic DNA was digested in a 40 µl volume of 1x CutSmart  
141 buffer with 1 µl of MFRE (MspJI or FspEI; New England Biolabs, Ipswich, MA) and 1.4 µl activator  
142 oligonucleotide (15 µM stock; see below) at 37°C for 3 hrs. DNA was subsequently size-selected and  
143 purified using either gel or column purification. For gel purification, samples were run on 20%  
144 polyacrylamide gels in 0.5x TBE and stained with SYBR Gold. Bands in the 20-40 bp range were  
145 excised, and each was placed in a 0.5 ml microcentrifuge tube with a small hole in the bottom. These  
146 were placed inside 1.5 ml tubes and centrifuged 5 min at 16,000 x g. DNA was soaked out of the  
147 fragmented gel in 100 µl 0.5x TBE buffer 4°C overnight, gel fragments were pelleted by centrifugation,  
148 and the supernatant (~60 µl) retained.

149 For column purification, smaller DNA fragments (<100 bp) were purified using the Monarch  
150 PCR Purification Kit (New England Biolabs) with a modified protocol. Briefly, 2 volumes of binding  
151 buffer were added to the digested DNA, and the sample was mixed and applied to the column  
152 supplied with the kit. The column was discarded, 2 volumes of 95% ethanol were added to the flow-  
153 through, and the sample was again mixed and applied to a fresh column. The column was washed  
154 as per the manufacturer's instructions, and the sample was eluted in 30 µl of 10 mM Tris pH 8.0, 0.1  
155 mM EDTA (TE). DNA was quantitated on a Qubit fluorimeter (Life Technologies, Eugene, OR), and a  
156 typical yield was < 15 ng.

157

158 **Preparation of enzyme activator oligonucleotides.**

159 A standard 28 base methylated hairpin oligonucleotide  
160 (CTGCCCAGGATCTTTTTTGATCCTGGCAG) is provided by the manufacturer (New England Biolabs)  
161 at 15 µM. We also designed three modified derivatives of this oligonucleotide (Integrated DNA  
162 Technologies, Coralville, IA; see Results). Activator-U and activator-NU replaced the 6-base poly-dT  
163 run at the hairpin loop with a 6-base poly-dU run. Activator-N and activator-NU attached an amino  
164 modifier C6 at the 5' end of the oligo (i.e., 1-aminohexane attached via C6 to the 5' phosphate) as a

165 ligation blocking group. These modified derivatives were resuspended to 15  $\mu$ M, denatured at 95° for  
166 5 min and cooled slowly to room temperature to anneal the hairpins.

167

### 168 **Library preparation and sequencing.**

169 Libraries were prepared using the NEBNext Fast DNA Library Prep Set for Ion Torrent (New  
170 England Biolabs) with IonXpress Barcode Adapters (Ion Torrent, Carlsbad, CA), or the NEBNext Ultra  
171 II DNA Library Prep Kit for Illumina and NEBNext Multiplex Oligos for Illumina (both New England  
172 Biolabs).

173 Ion Torrent libraries were prepared using 18  $\mu$ l (~4 ng) gel-purified DNA or 25 ng column-  
174 purified DNA as input according to the manufacturer's protocol, with the following exceptions. To  
175 minimize the denaturation of the small DNA fragments that would occur with a heat-treatment step,  
176 end repair was carried out with a mixture of bead-immobilized T4 DNA polymerase and T4  
177 polynucleotide kinase (both kind gifts of Dr. M. Xu, New England Biolabs) in a 20  $\mu$ l volume of End  
178 Repair buffer, 20 min at 25°C. The immobilized enzymes were removed on a magnetic rack.  
179 Barcode and P1 adapters were used at 1:100 dilutions. Following adapter ligation, the library was  
180 amplified with 10-12 cycles of PCR.

181 Illumina libraries were prepared using 25 ng column-purified DNA as input according to the  
182 manufacturer's protocol. Adapters were used at 1:10 dilutions, and the library was amplified with 5  
183 cycles of PCR. Fragment sizes were determined using a BioAnalyzer (Agilent Technologies, Santa  
184 Clara, CA), and libraries with fragments over 500 bp were size-selected with the following protocol.  
185 50  $\mu$ l of library was mixed with 0.55x NEBNext Sample Purification Beads (New England Biolabs;  
186 "beads"), incubated at room temperature for 5 min, and the supernatant was retained. The  
187 supernatant was mixed with 0.9x beads and incubated at room temperature for 5 min; beads were  
188 washed twice with 200  $\mu$ l 80% ethanol, dried 5 min, and DNA fragments were eluted in 30  $\mu$ l TE.  
189 Multiplexed samples were sequenced on a MiSeq (Illumina, San Diego, CA) using a 2x50 paired-end  
190 kit.

191

### 192 **Sequence read processing.**



193 Paired-end Illumina reads were merged using SeqPrep (<https://github.com/jstjohn/SeqPrep>)  
194 with a minimum overlap for merging of 20, a minimum overlap of 5 for adapter trimming, and a  
195 minimum 26 bp merged read size. Ion Torrent reads were merged and trimmed by the  
196 manufacturer's software. A set of Perl scripts performed the subsequent mapping, motif-finding, and  
197 motif analysis functions. Trimmed reads were mapped to a reference sequence, and only exact  
198 matches over the entire read length were retained. Duplicate reads were collapsed, and the non-  
199 redundant set of reference-matching reads was binned by length. Motif-finding was performed on  
200 each bin separately, typically in the range of 26-45 bp.

201

### 202 **Relationship between methylation and read length.**

203 MFREs cleave at a fixed distance (16 bp 3') from the m5C base and require m5C residues on  
204 both strands to generate fragments of defined length. Consequently, the precise fragment length  
205 generated by cleavage of a fully methylated motif depends on the relative positions of the m5C on the  
206 two strands (Figure 1). If  $x$  is the number of bases that separate the top-strand m5C in the motif from  
207 the bottom-strand m5C (for examples,  $x = 1$  for AGCT and  $x = -2$  for CCWGG), then the resulting  
208 fragment length from MFRE cleavage will be  $l_x = x + 33$  provided the DNA was cut at the expected  
209 distance on both sides. Sequence reads derived from these fragments will also be of length  $l_x$   
210 provided the sequence was also accurately trimmed *in silico* by the adapter-trimming algorithm. For  
211 an 8-base motif (the longest observed m5C-containing motif),  $l_x$  can vary from 26 to 40 bp, and so we  
212 typically examine reads in this length range. The value of  $x$  cannot be 0 (so  $l_x$  cannot be 33), since  
213 this would mean the top and bottom strand m5C residues would be base-paired with each other.

214

215 **Figure 1.** MFRE cleavage and formation of library inserts. A) Recognition sites (blue) and cleavage  
216 positions (arrows) of three commercially available MFREs. B) Product of MspJI (recognition site in  
217 blue) cleavage of the fully methylated motif CCWGG (boxed), before and after end repair. The m5C  
218 residue on each strand is the 17<sup>th</sup> base from the 3' end.

219

220 In order to determine what fraction of reads are correctly cut and trimmed, we analyzed  
221 samples where the motif and specific methylated bases were known *a priori*. In such cases, it is  
222 helpful to represent a motif-containing read as a pair of lengths,  $(d_1, d_2)$ , where  $d_1$  and  $d_2$  are the  
223 “cleavage distances” between the methylated bases and the ends of the read. Strand orientation is  
224 random, so by convention we represent the pair such that  $d_1 \leq d_2$ . These lengths are measured from  
225 the top-strand m5C to the 3' end of the read and from the G opposite the bottom-strand m5C to the 5'  
226 end of the read. For a correctly cut and trimmed read,  $d_1 = d_2 = 16$ , and such a read would be  
227 designated “(16,16)”. We typically group values of  $d$  less than 14 and greater than 18 as “-13” and  
228 “19+”, respectively.

229

### 230 **Enriching for methylation-derived reads.**

231 Sequence reads that are derived from MFRE cleavage at the standard distance (16 bp 3' to  
232 the m5C on both strands) and accurately adapter-trimmed *in silico* we term “CCMD reads” (correctly  
233 cut and trimmed methyl-derived reads). It is from CCMD reads that we can easily determine MTase  
234 motifs by direct alignment. However, the sequence reads produced by MFRE-Seq contain many  
235 types of reads besides CCMD reads. These can include sequences derived from contaminants;  
236 error-containing sequences derived from the intended DNA; sequences from inserts broken on one or  
237 both sides by mechanical or non-MFRE enzymatic breakage; interstitial fragments between  
238 methylated fragments; and MFRE-cleaved fragments that were not correctly cut and trimmed. The  
239 last of these categories in particular is expected to be numerous, since MFREs have been shown to  
240 occasionally cut 1 bp beyond the expected length. We therefore included several *in silico* filtering  
241 steps to enrich the data set for CCMD reads.

242 By definition, all CCMD reads are (16,16), meaning they have a C as the 17<sup>th</sup> base from the  
243 3' end and a G as the 17<sup>th</sup> base from the 5' end. The converse is not always true, since some reads  
244 (1 in 16 in a random set) will coincidentally have a C and a G at these respective positions. However,  
245 by filtering out all reads that do not satisfy these properties, we significantly enrich for CCMD reads in  
246 our sequencing data. This process is effective for many but not all motif and methylation structures  
247 (Table S1). Thus, there are three filtering steps altogether: (1) removal of reads that are not exact

248 matches to the reference (“reference-filtering”), (2) removal of reads outside the 26-40 bp range  
249 (“size-filtering”), and (3) removal of reads not containing C and G at the expected positions (“base-  
250 filtering”).

251

#### 252 **Deduction of motifs from read sets.**

253 To look for motifs, filtered reads of a given length were aligned in an ungapped fashion, and  
254 for each column of the alignment the nucleotide distribution was determined. Using Kullback-Leibler  
255 (KL)-divergence, this distribution was compared to the distributions expected of all possible IUPAC  
256 base symbols (degenerate and non-degenerate) based on the actual overall base frequencies of the  
257 reference sequence. The IUPAC symbol with the smallest KL value was assigned to that column.  
258 Consecutive N's at the start and end of the alignment were removed, and the string of remaining  
259 symbols was scored for complexity. All strings have at least one C and one G due to the base-  
260 filtering criterion, so the string had to have sufficient additional complexity to be considered a possible  
261 motif. Individual IUPAC symbols were assigned the following arbitrary scores, and the score for the  
262 string was the sum of all individual base scores: (A, C, G, T) = 8; (R, Y, M, K, S, W) = 4; (H, B, V, D)  
263 = 2. One C, one G, and all N's were removed from the string prior to scoring, and all strings with  
264 complexity scores  $\geq 10$  were considered candidate motifs. Thus, CCGG (score = 16) would be  
265 considered a candidate motif, but CRYG (score = 8) and CNNG (score = 0) would not.

266

#### 267 **Deconvolution of composite motifs.**

268 The approach above oversimplifies certain cases, requiring additional analysis. These  
269 include read sets with multiple motifs, read sets with non-palindromic motifs, and motifs with base  
270 dependencies. Such cases often present themselves as candidate motifs with degenerate bases, yet  
271 with enough complexity to pass the scoring threshold above. Degenerate bases in a motif can result  
272 from legitimate tolerance for multiple bases at a given position in the MTase's DNA binding footprint,  
273 or they can result from the inappropriate merging of independent substrate sequences.

274

| Type | True Motif(s) | Apparent Motif |
|------|---------------|----------------|
|------|---------------|----------------|

|                 |                                            |                          |
|-----------------|--------------------------------------------|--------------------------|
| Multiple motifs | <u>C</u> CGG, <u>C</u> ATG                 | <u>C</u> MKG             |
| Non-palindromic | C <u>C</u> CGC / G <u>C</u> G <u>G</u> G   | S <u>C</u> S <u>G</u> S  |
| Base dependency | G <u>C</u> TAGC + G <u>C</u> CG <u>G</u> C | G <u>C</u> YR <u>G</u> C |
| True degeneracy | G <u>C</u> YR <u>G</u> C                   | G <u>C</u> YR <u>G</u> C |

275

276 To distinguish these possibilities, degenerate motifs are further analyzed by examining the  
277 frequencies of all non-degenerate instances of that motif among filtered reads of the appropriate  
278 length. Cases of inappropriate merging will become apparent as certain base combinations within the  
279 degeneracy do not appear or appear very rarely. For the two apparent GCYRGC cases above, in the  
280 top case only TA and CG would appear at appreciable frequencies at the YR positions, while in the  
281 bottom case all four combinations (TA, CG, TG, and CA) would appear at similar frequencies.

282

283

## 284 RESULTS

285

### 286 Experimental design.

287 To determine m5C MTase motifs, we employed the following general approach (Figure 2).  
288 Purified genomic DNA was digested with one or more MFREs, and small (<100 bp) fragments were  
289 selectively purified using either gel electrophoresis/excision or spin-column binding/elution.  
290 Sequencing libraries were then constructed from the purified fragments and sequence data obtained.  
291 After paired-read merging and adapter trimming, the typical range of read lengths was 20-80 bases  
292 for Ion Torrent and 26-80 bases for Illumina. Reads were mapped to a reference sequence, those  
293 that were not exact matches to the reference (i.e., no gaps and no mismatches) were discarded, and  
294 those that remained were oriented to the top strand of the reference. Remaining reads were then  
295 base-filtered (see Materials and Methods) and sorted by length, and the set of reads of each length  
296 within the range 26-40 bp was tested separately for the presence of conserved motifs.

297

298 **Figure 2.** Overview of MFRE-Seq. Genomic DNA containing motifs that are fully methylated (red  
299 dots) or hemi-methylated (open red circles) is digested with one or more MFREs. Size selection  
300 enriches for the small fragments that result from MFRE cleavage of fully methylated sites, and  
301 sequencing libraries are prepared from these fragments (adapters in green). Sequence reads are  
302 then mined for motifs. The computational method for doing so described in this work involves binning  
303 reads by length, enriching for CCRM reads by base-filtering, aligning, and examining the base  
304 distribution at each position.

305

### 306 **Sequence read analysis from cleavage of the *E. coli* Dcm site.**

307 We first tested this approach on several samples where the methylated motif was known by  
308 other means, starting with *E. coli* K-12, whose genome is methylated by Dcm at CCWGG sites but is  
309 free of other m5C MTases. This site can be effectively cut by both MspJI (as it overlaps C $\underline{N}$ NR) and  
310 FspEI (as it overlaps CC $\underline{C}$ ), and the expected (16,16) cleavage products are 31 bp. We digested 1  $\mu$ g  
311 of genomic DNA from *E. coli* DHB4 (an F<sup>+</sup> K-12 derivative) with MspJI or FspEI and prepared Illumina  
312 sequencing libraries from 25 ng of column-purified digest, which was subsequently size selected (see  
313 Materials and Methods for details) and sequenced with 2x50 paired-end kits. Four duplicate libraries  
314 constructed from separate digests were sequenced, one multiplexed with a second sample and run  
315 on a MiSeq and the other three each multiplexed with eight other samples and run on a NextSeq. In  
316 all four trials, the fraction of all reads that were exact matches to the reference sequence was >96%  
317 (Table 1). The mean copy number of each read varied between trials, from 15x to 80x (Table 1).

318

319 **Table 1.** Replicate experiment statistics, *E. coli* DHB4 genomic DNA.

320

| Replicate                             | 1         | 2          | 3          | 4          |
|---------------------------------------|-----------|------------|------------|------------|
| MFRE                                  | FspEI     | FspEI      | FspEI      | MspJI      |
| Platform                              | MiSeq     | NextSeq    | NextSeq    | NextSeq    |
| Multiplex                             | 2         | 9          | 9          | 9          |
| Pairs Merged <sup>a</sup>             | 7,925,782 | 15,288,614 | 19,851,338 | 13,396,381 |
| Pairs with Adapters <sup>a</sup>      | 7,118,719 | 14,941,064 | 19,027,975 | 13,258,050 |
| Pairs Discarded <sup>a</sup>          | 270,585   | 312,512    | 600,062    | 550,688    |
| Reads Matching Reference <sup>b</sup> | 7,657,629 | 14,944,470 | 19,419,069 | 13,099,298 |
| Fraction Matching Reference           | 0.966     | 0.977      | 0.978      | 0.978      |
| Unique Reads Matching Ref.            | 191,145   | 230,260    | 243,416    | 876,198    |

|                           |     |     |     |     |
|---------------------------|-----|-----|-----|-----|
| Mean Redundancy           | 40  | 65  | 80  | 15  |
| Unrepresented CCWGG sites | 696 | 684 | 663 | 636 |

321

322 <sup>a</sup> Output from SeqPrep.

323 <sup>b</sup> Exact matches, no polymorphisms or indels.

324

325           Knowing the motif and methylated bases ahead of time, we could classify the sequence  
326 reads containing CCWGG in terms of the distances between the methylated bases and the ends of  
327 the read. (If a read contained multiple instances of the motif, we chose the motif instance closest to  
328 the center of the read for this purpose.) Tables 2a and 2b show the number of all reads and base-  
329 filtered reads, respectively, with each possible pair of distances. Among all (reference-matching)  
330 reads, the most common categories were (16,16) > (16,17) >> (16,19+) > (17,17) > (15,16) >> all  
331 other categories (Table 2a). Thus, the vast majority of reads were either (16,16) reads (length 31;  
332 67.6%) or (16,17) reads (length 32; 23.4%). Combined, 96.4% of reads have at least one flank that  
333 was correctly cut and trimmed ( $d = 16$ ), but a sizeable number (26.5%) had at least one flank with 1  
334 extra base. The extra bases likely result from the MFREs cutting 1 base farther from the m5C than  
335 expected, as has been observed previously (39).

336

337 **Table 2a.** Flank length analysis of all reference-matching, motif-containing reads derived from  
338 Illumina DHB4 run.

339

| Short flank | Long flank |    |     |           |           |        |         |
|-------------|------------|----|-----|-----------|-----------|--------|---------|
|             | ≤13        | 14 | 15  | 16        | 17        | 18     | ≥19     |
| ≤13         | 0          | 9  | 229 | 24,276    | 4,645     | 158    | 15,079  |
| 14          |            | 87 | 90  | 10,295    | 1,563     | 16     | 658     |
| 15          |            |    | 737 | 120,429   | 19,919    | 335    | 2,382   |
| 16          |            |    |     | 4,161,371 | 1,440,996 | 27,914 | 148,368 |
| 17          |            |    |     |           | 130,421   | 5,278  | 29,356  |
| 18          |            |    |     |           |           | 40     | 910     |
| ≥19         |            |    |     |           |           |        | 7,306   |

340

341           Because not all reads were of the categories above, and not all contained the CCWGG motif,  
342 we compared the reads we obtained (from the trial in column 1 of Table 1) to a theoretical FspEI  
343 digest of *E. coli* DHB4. We classified the theoretical fragments as one of six categories: “motif-  
344 cleaved” (when exactly cut, these are CCMD fragments), “interstitial” (regions between motif-cleaved

345 fragments), “overlap-short” (non-motif containing fragments created by cutting two CCWGG sites  
 346 spaced less than 30 bp apart), “overlap-long” (containing 2 motifs, created by cutting CCWGG sites  
 347 less than 30 bp apart without cutting between them), “other” (created by more complicated situations  
 348 such as 3 or more clustered motifs), and “concatenated” (reads spanning an expected cut site, which  
 349 most often consist of a motif-containing CCMD fragment joined to an interstitial fragment). The real  
 350 reads were matched to the theoretical fragments and classified as one of four categories based on  
 351 how they were cut: “exact” (cutting at the expected MFRE site on both ends), “approximate” (cutting  
 352 within 4 bp of the expected site on both ends), “one-cut” (cutting within 4 bp of the expected site on  
 353 one end only), and “neither” (not cutting within 4 bp of the expected site on either end). Results are  
 354 shown in Table 3.

355

356 **Table 3.** Comparison of real sequence reads with theoretical digest fragments of *E. coli* DHB4.<sup>a</sup>

357

|                      | <b>Exact</b>                         | <b>Approximate</b>                  | <b>One-Cut</b>                     | <b>Neither</b>                    |
|----------------------|--------------------------------------|-------------------------------------|------------------------------------|-----------------------------------|
| <b>Motif-Derived</b> | 11,731<br><i>8,940,794</i><br>(762x) | 64,631<br><i>3,844,900</i><br>(59x) | 1,651<br><i>10,802</i><br>(6.5x)   | 0<br><i>0</i><br>(n/a)            |
| <b>Interstitial</b>  | 0<br><i>0</i><br>(n/a)               | 5,718<br><i>1,205,541</i><br>(211x) | 76,774<br><i>329,449</i><br>(4.3x) | 20,182<br><i>31,260</i><br>(1.5x) |
| <b>Overlap-Short</b> | 24<br><i>3,429</i><br>(143x)         | 3<br><i>104</i><br>(35x)            | 0<br><i>0</i><br>(n/a)             | 0<br><i>0</i><br>(n/a)            |
| <b>Overlap-Long</b>  | 291<br><i>6,516</i><br>(22x)         | 723<br><i>6,538</i><br>(9.0x)       | 1,298<br><i>28,434</i><br>(22x)    | 10<br><i>30</i><br>(3.0x)         |
| <b>Other</b>         | 0<br><i>0</i><br>(n/a)               | 6,938<br><i>350,915</i><br>(51x)    | 1,721<br><i>9,972</i><br>(5.8x)    | 101<br><i>168</i><br>(1.7x)       |
| <b>Concatenated</b>  | 0<br><i>0</i><br>(n/a)               | 0<br><i>0</i><br>(n/a)              | 18,891<br><i>141,864</i><br>(7.5x) | 19,573<br><i>33,754</i><br>(1.7x) |

358

359 <sup>a</sup> For each category, the top line (Roman type) shows the number of unique sequence reads, the  
 360 middle line (italic) shows the number of all sequence reads, and the bottom line (in parentheses)  
 361 shows the copy number of the reads in this category (all/unique).

362

363 The relatively low numbers of concatenated fragments, as well as the low number of motif-  
 364 containing fragments cut on only one side, indicate that the digest was largely complete (Table 3).

365 The vast majority of reads were motif-cleaved, either exactly or approximately cut on both sides. The  
366 lower copy number of approximately cut sequences here reflects the fact that approximate cutting  
367 generates a variety of ends on both sides. When CCWGG cutting sites overlapped (within 30 bp of  
368 each other), the most common fragments were of the overlap-long type, perhaps indicating that  
369 MFREs have a harder time cutting shorter fragments. In other words, once an overlap-long fragment  
370 is created, the enzyme has a harder time cutting it further. Most theoretical interstitial fragments are  
371 longer than 80 bp, so many of those that appear in the sequence reads are cut on one or neither side  
372 by an MFRE and must be broken on the other side by some other process. Those less than 80 bp  
373 are present at high copy number, but all of these are approximately rather than exactly cut.

374 In addition to reads without the motif, we also observed CCWGG sites in the reference  
375 without a corresponding read in the sequence data. In our four replicate *E. coli* DHB4 experiments,  
376 we observed a mean of 670 out of 12,321 (5.4%) CCWGG sites to be unrepresented by either  
377 (16,16) or (16,17) reads in our sequence data (Table 1). While some of these may be truly  
378 unmethylated, alternative explanations for the non-representation of these sites include errors in the  
379 reference sequence; lack of full methylation at specific sites due, for example, to steric hinderance by  
380 DNA binding proteins; systematic cleavage bias away from (16,16) products; and interference of  
381 closely proximal sites.

382 We compared the four sets of unrepresented sites and found that the vast majority of them  
383 (623) were common to all four data sets (Figure S1). There was no significant distinction between  
384 either the MFRE used for the digest or the machine used for sequencing. We mapped the locations  
385 of these 623 sites and found they corresponded to repeat regions, most notably a region of the  
386 chromosome duplicated on the F' element and the rRNA gene clusters. The apparent absence of  
387 these sites is therefore due to the pileup of reads derived from duplicate locations on the  
388 chromosome to a single locus. After filtering out these repeat locations, we found only 100 of 12,321  
389 sites (0.8%) of CCWGG sites unrepresented in the data.

390

391 **Motif finding approach.**



392 The results in Table 2a show that many reads are not of the (16,16) variety, and so the  
393 precise motif location in any given read cannot be assumed with certainty. Table 2b shows that, in  
394 this particular instance at least, base filtering effectively enriches for (16,16) reads: there are  
395 4,161,371 reads of type (16,16), representing 67.6% of all reads and 96.0% of base-filtered reads.

396

397 **Table 2b.** Flank length analysis of base-filtered reference-matching, motif-containing reads  
398 derived from Illumina DHB4 run.

399

| Short flank | Long flank |    |     |           |    |    |        |
|-------------|------------|----|-----|-----------|----|----|--------|
|             | ≤13        | 14 | 15  | 16        | 17 | 18 | ≥19    |
| ≤13         | 0          | 0  | 55  | 7,948     | 0  | 0  | 1,466  |
| 14          |            | 0  | 15  | 1,160     | 0  | 0  | 2      |
| 15          |            |    | 737 | 120,429   | 0  | 0  | 425    |
| 16          |            |    |     | 4,161,371 | 0  | 0  | 38,066 |
| 17          |            |    |     |           | 0  | 0  | 0      |
| 18          |            |    |     |           |    | 0  | 0      |
| ≥19         |            |    |     |           |    |    | 372    |

400

401 We looked for data features independent of the knowledge of motif content or structure that  
402 would be useful for inferring whether or not reads of a given length are CCMD reads. In particular,  
403 we looked at the number of sequencing reads obtained, the redundancy (copy number) of reads, and  
404 the fraction of reads that survived base filtering. All reads, even those generated by random  
405 processes, may potentially appear multiple times in the data due to amplification during library  
406 preparation. However, because CCMD reads are generated by repeated cleavage at a limited  
407 number of genomic locations, we would expect all three of these metrics to be significantly higher for  
408 CCMD reads than for the “background” consisting of reads generated by more random processes.  
409 Since we expect CCMD reads to be in the 26-40 base range, we use as background values of these  
410 metrics the mean values calculated for reads outside of this range (46-80 bases in length).

411 Figure 3 shows that, for the *E. coli* K-12 DHB4 experiment, the three metrics mentioned  
412 above peak sharply around length 31 (the expected (16,16) length). The background rate of  
413 redundancy is roughly 13 copies per sequence, while the redundancy at lengths 31 and 32 are  
414 significantly higher, at 245 and 67 copies per sequence, respectively (Figure 3A). These two lengths  
415 are also those with the highest absolute numbers of reads (Figure 3B). The “background” fraction of

416 reads that survived base filtering was 8.1% (comparable to 6.2%, that expected of randomly  
417 generated reads of 50% G+C), while this fraction was significantly higher among reads of length 30  
418 (92%) and 31 (99%) (Figure 3C).

419

420 **Figure 3.** Diagnostic statistics from Illumina sequencing of FspEI-digested *E. coli* K-12 DHB4. This  
421 strain is methylated by Dcm at CCWGG sites, resulting in 31 nt CCMD reads (dotted vertical line). All  
422 numbers are for reference-matched reads. Top: total number of reads of each length. Middle:  
423 mean read copy number of each length. Bottom: fraction of reads of each length that passed base  
424 filtering.

425

426 The vast majority of reads of length 30 (high number of reads and fraction of base-filtered  
427 reads, but low redundancy), 31 (high number of reads, fraction of base-filtered reads, and  
428 redundancy), and 32 (high number of reads and redundancy, but low fraction of base-filtered reads)  
429 are (15,16), (16,16), and (16,17), respectively (Table S2). We further sorted the reads of length 31 by  
430 copy number, and for each copy number we examined the fraction of base-filtered reads and the  
431 fraction of (16,16) (i.e., motif-containing) reads. The copy number ranged from 1 to 7129 copies, with  
432 a mean of 245. Most of the non-(16,16) reads of this length are (15,17) and are present in less than  
433 15 copies, which is approximately the “background” rate.

434 The data above suggests the following approach to determining motifs (of unknown  
435 sequence, length, and number) in sequencing data from MFRE cleavage:

436

- 437 1. Establish background levels of read numbers, redundancy, and base-filtered read fraction  
438 based on reads outside the expected range of true cleavage products (e.g., those from 46-80  
439 bp).
- 440 2. Identify read lengths for which at least one of the metrics above (numbers of reads, mean  
441 copy number, or fraction of base-filtered reads) is above the background levels.
- 442 3. For each of these lengths, eliminate reads with copy numbers at or below the background  
443 level, and determine motifs from the remainder. Keep those motifs that are sufficiently

444 specific to be real. Some of these may be spurious, derived from overlapping instances of  
445 the same motif in (16,17) or (15,16) reads, and we expect such spurious motifs to be less  
446 specific than the true motifs from which they are derived.

447 4. From the set of possible motifs, identify that with the highest per-base specificity score ( $m_{\max}$ )  
448 and save it in the final set of motifs. From the length of read from which it is derived (i.e., the  
449 presumed (16,16) length), identify the methylated bases.

450 5. Delete all reads derived from motif  $m_{\max}$  with exact cleavage on at least one end. (This  
451 includes not just (16,16) reads but also (x,16) and (16,x), where  $x \neq 16$ ).

452 6. Repeat steps 3-5 on the reduced set of reads, identifying the next most specific motif. Iterate  
453 until no more motifs are found.

454

455 Applying this pipeline to the *E. coli* DHB4 data set, we obtained a single motif, the expected CCWGG.

456 We have used this same pipeline to determine the other motifs presented in this work.

457

#### 458 **Reduction of unproductive sources of sequence.**

459 MFRE enzymes require interaction with multiple instances of their recognition sites for  
460 efficient cleavage, and so cleavage of a desired substrate can be driven towards completion by the  
461 addition of an “enzyme activator” oligonucleotide containing the MFRE’s methylated recognition site  
462 (39). The activator provides an excess of recognition sites for binding *in trans* but is too short to be  
463 cleaved by the enzyme.

464 In our initial experiments, sequence data included some reads derived from the MFRE  
465 enzyme activator. To prevent sequencing of the activator, we tested three derivatives: “activator-U”  
466 (where two adjacent thymine residues in the loop were replaced by uracils, preventing amplification of  
467 library molecules derived from it), “activator-N” (where the 5' phosphate is blocked by a C6-amino  
468 modification, preventing ligation with the library adapters), and “activator-UN” (containing both  
469 modifications). All three adapters stimulated cleavage of *Pseudomonas mendocina* genomic DNA  
470 (GGWCC modified, see Table 4) by MspJI to a comparable degree (Figure S2). We then prepared  
471 libraries of *P. mendocina* and *Bacillus* sp. N3536 genomic DNA digested with MspJI with the different

472 activators and sequenced on the Ion Torrent platform. The numbers of reads matching activator-N  
473 and activator-NU were close to the background where no activator was added to the reaction.  
474 Activator-U provided at least 10x reduction in the number of reads compared to the standard,  
475 unmodified activator but more than activator-N and activator-NU (Table S3). We therefore used  
476 activator-N in all subsequent library preparation reactions.

477 We also tested the distribution of reads obtained using three methods of post-digest fragment  
478 purification: gel-purification, a standard column-purification protocol used for oligonucleotide cleanup,  
479 and a two-step column-purification protocol more suited to separating oligonucleotides from larger  
480 DNA fragments. We examined the distribution of read lengths from three independent experiments,  
481 all sequenced on the Ion Torrent platform (Figure S3). Unsurprisingly, the background of non-MFRE-  
482 derived reads was significantly higher with the single-column method than the other two methods  
483 (Figure S3). Of the other two methods, the two-column purification method is significantly less labor-  
484 intensive, requires less time, and does not suffer from contamination with DNA marker-derived reads,  
485 we have primarily used this method for digest cleanup prior to library preparation.

486

#### 487 **Minimal examples to derive motif.**

488 In the above example, there are 12,321 instances of CCWGG in the *E. coli* DHB4 genome, of  
489 which 11,940 (96.9%) were represented in the sequence data by (16,16) reads. There may be other  
490 experiments in which the motif is comparatively rare, and/or in which fewer reads are generated, so  
491 we wished to determine how many examples [i.e., unique (16,16) reads] were required to accurately  
492 determine a motif.

493 We generated randomized sequences *in silico* that included “*in silico* CCMD” sequences  
494 [mock (16,16) reads with the motif in the center and flanks of random bases] and a specified fraction  
495 of “*in silico* non-CCMD” sequences (identical in length to the “true” sequences, but with randomized  
496 sequence replacing all of the motif except the C and G bases required to pass base filtering). All  
497 randomized sequence was biased to a predetermined %G+C content, and degenerate positions  
498 within the motif were randomly assigned among the permitted bases.

499 We generated sets of random reads to simulate determination of the CCWGG motif from 31  
500 base reads using the KL-divergence based motif finding script. Adding one read at a time,  
501 progressively larger read sets were generated in order to determine the largest number of unique  
502 reads from which the program *incorrectly* deduced the motif (if sets of size  $a+1$  through  $a+50$  all  
503 correctly deduced the motif but  $a$  did not, the experiment stopped and  $a$  was considered the largest  
504 incorrect set). Several experiments were run, varying %G+C between 30-70 and the fraction of non-  
505 CCMD reads between 0-0.2. The results of each experiment were determined as the mean of 25  
506 replicate runs.

507 Results are shown in Figure 4. The method is robust to changes in %G+C and to fractions of  
508 non-CCMD reads up to 0.1. With increasing non-CCMD fraction between 0.1-0.2, the number of  
509 reads required to correctly deduce the motif rises rapidly, and above 0.2 it was impossible to  
510 accurately determine the motif even up to 100,000 unique reads (far above the number typically  
511 possible for a bacterial genome). In the *E. coli* DHB4 experiment above, there were 11,064 unique  
512 base-filtered reads above the background redundancy level of 13, and only 10 of these were non-  
513 CCMD reads, so the non-CCMD fraction in this particular example was 0.001. For 0% non-CCMD  
514 reads, correct deduction required 33-69 examples; for 5%, 34-66 examples; and for 10%, 45-102  
515 examples. We obtained similar results for a variety of motifs of varying motif lengths, flank lengths,  
516 and degenerate base content (data not shown). Typically, higher numbers of reads were required at  
517 more skewed %G+C values due to the lower complexity of these randomized sequences.

518

519 **Figure 4.** Bar graph of random read analysis. For each combination of G+C content and fraction of  
520 non-CCMD reads (horizontal axes), we determined the largest number of reads at which the motif  
521 was inaccurately called and added one to this value. The number of reads to accurately call the motif  
522 (vertical axis) was calculated as the mean of 25 replicate determinations.

523

#### 524 **Characterization of m5C motifs in multiple genomes.**

525 We then applied this motif-finding approach to other genomes, using two DNA sequencing  
526 platforms and using different degrees of multiplexing. In most of these genomes, the expected motifs

527 were unknown beforehand. Tables 4 (Ion Torrent) and 5 (Illumina MiSeq) show the number of unique  
528 reads from which each motif was derived, the total number of motif sites in the reference, and the  
529 fraction of all sites that was detected. Illumina reads ranged from 26-80 bases, and Ion Torrent reads  
530 from 20-80 bases. Reads of length 41-80 bases were used to determine background parameters,  
531 and those of lengths 26-40 bases were searched for motifs. As many as four motifs were discovered  
532 in a single genome by a single MFRE (*S. denitrificans* DSM1251 in Table 5).

533 Motifs were successfully identified with as few as 51 unique reads, and from samples  
534 multiplexed to as many as 11 per run. In some cases, the MFRE's own recognition site prevented  
535 cleavage of every instance of a MTase motif, and so the "apparent" motif (i.e., that determined  
536 automatically by the program) is over-constrained. For example, GATC appears as *Y*NNGATCNNR  
537 when digested by MspJI, and CGATCG appears as CCGATCGG when digested by FspEI. (Bases in  
538 italics are part of the MFRE recognition site but not of the MTase motif.). These extraneous elements  
539 were removed manually. For these cases, the tables show data for both the "true" motif and the  
540 "apparent" (MFRE-cleavable) version of the motif, including the fraction of true and apparent sites  
541 represented in the sequence data. The difference between these two fractions was often large (see,  
542 for examples, GATC and GGWCC in Table 4 and CGATCG in Tables 4 and 5).

543 In most cases, the deduced motif was derived from at least 30% of all motif sites in the  
544 genome, but in several cases the fraction of sites represented in the sequence data was lower, even  
545 when the site was not constrained by MFRE cleavage preferences. Even when the fraction of  
546 detected sites was low, we could often identify evidence that it was genuine. For example, ACCGGT  
547 was identified as a motif in *A. gelatinovorum* based on detection of only 24% of genomic sites in the  
548 sequence data (Table 5). This motif corresponds to that of Agel, a REase previously characterized  
549 from this organism. In *S. cremoris* F, the site CCNNGG was detected among only about 10% of sites  
550 by both MspJI and FspEI cleavage independently, but this activity (M.ScrFIA/B) has again been  
551 previously characterized (40). It appears in this case that a small number of M.ScrFI sites are highly  
552 overrepresented in the sequence data. And in *Arthrobacter* sp., the site AGCT was detected from  
553 only 5% of cleavable reads by MspJI. Although the fraction of sites is very low, the closest  
554 characterized homologs of the enzyme responsible, M.AscII, methylate this same site.

555 In certain cases, motifs were difficult to deduce due to significant off-target activity,  
556 presumably by the MTase. For example, in *Halorubrum* sp. BOL3-1 cleaved with MspJI, the apparent  
557 motif was BTCGAV (3265/33,268 = 9.8% sites represented). However, on closer inspection, this  
558 motif was composed of a canonical motif, CTCGAG (95.2% sites represented; Table 4), plus off-  
559 target activities at the asymmetric sites GTCGAG/CTCGAC (1937/12,621 = 15.3%) and  
560 TTCGAG/CTCGAA (780/5496 = 14.2%). Similarly, in *N. meningitidis* 95-134 cleaved with MspJI, the  
561 apparent motif YCWGR was composed of the canonical motif CCWGG (Table 5) plus off-target  
562 activity at the asymmetric site CCWGA/TCWGG (841/6971 = 12.1%).

563 A summary of the motifs identified in Tables 4 and 5 is shown in Table S4, and a summary of  
564 the genes responsible, arranged by genome, is shown in Table S5. In the 27 genomes under study  
565 (including the heterologous MTases expressed in two *E. coli* clones), 24 separate motifs were  
566 identified. The most common motifs found were CCWGG (5 genomes, not including the clones) and  
567 GATC (4 genomes), with most motifs found in a single genome. All except one were palindromic.  
568 While this result may reflect inherent biases in the MFRE-Seq method (see Discussion), it does  
569 appear that the large majority of m5C motifs identified by other methods are also palindromic (Table  
570 S6). In the majority of the motifs we found (18 of 24), the top strand m5C was located 5' to the  
571 bottom strand m5C, resulting in CCMD read lengths less than 33 bases. Motif lengths ranged from 4  
572 to 8 bp and CCMD lengths ranged from 28 to 37 bases despite the fact that our search parameters  
573 permitted the identification of motifs and read lengths outside of these ranges. To date, no m5C  
574 MTases have been found to be associated with Type I or Type III R-M systems (16), and so all of the  
575 motifs found here likely belong to Type II R-M systems or to orphan MTases.

576

#### 577 **Comparison with an independent method.**

578 As this manuscript was being prepared, a novel method for detecting m5C, EM-Seq, has  
579 been described (Vaisvila et al., manuscript submitted) and commercialized as a kit (New England  
580 Biolabs, Ipswich, MA). The kit relies on the same principle of C>U conversion as bisulfite sequencing  
581 but uses enzymatic rather than chemical methods to accomplish this. While MFRE-Seq is cheaper  
582 and less labor-intensive, we wished to validate our results with an independent method and used EM-

583 Seq for this purpose. We compared results of MFRE-Seq and EM-Seq for two bacterial strains and  
584 three digests (*E. coli* DHB4 with MspJI, *E. coli* DHB4 with FspEI, and *P. mendocina* with MspJI) and  
585 found they yielded identical results (CCWGG in the case of both *E. coli* digests and GGWCC in the  
586 case of *P. mendocina*).

587

## 588 DISCUSSION

589

590         Aside from the methylated base itself, the recognition site, or motif, is the primary  
591 distinguishing characteristic of bacterial DNA MTases. In the last ten years, the determination of  
592 MTase motifs has become commonplace due to the SMRT sequencing platform. However, results  
593 from SMRT sequencing have been uneven, with the vast majority of characterized examples being  
594 m6A and m4C MTases, for which the kinetic signals are pronounced. The study of m5C MTase has  
595 lagged behind due to the location of the methyl group. While methyl groups on m6A and m4C are  
596 directly involved with base pairing, that on m5C is not and is instead positioned in the major groove  
597 where it does not significantly contact the DNA polymerase (41), resulting in a more subtle  
598 perturbation of the kinetics of base incorporation. Roughly one third of all Type II R-M systems utilize  
599 m5C as the protective agent, and so alternative methods to characterize m5C MTase motifs are  
600 necessary to gain a complete picture of bacterial epigenetics.

601         In Type II R-M systems, the specificity determinants of paired MTases and REases are  
602 independent of each other. Because MTases were so rarely characterized prior to ten years ago, it  
603 was traditionally assumed that the recognition site of a MTase was identical to its cognate REase.  
604 SMRT sequencing results have shown that, for m6A and m4C MTases, this assumption holds true in  
605 most cases (see examples in REBASE). Using MFRE-Seq, we show here that it holds true of m5C  
606 MTases as well. Tables 4 and 5 include fourteen cases where an observed m5C activity can be  
607 matched with a characterized restriction enzyme from the same strain. In all cases, the MFRE-  
608 determined methylation motif matches exactly the recognition site of the known REase: HhaI, Avall,  
609 PmeII, MspI, Rsp241I, SdeAII, BsrFI, AflI, PmlI, ScrFI, BscXII, BmtI, AgeI, and AclI. While it is



610 reasonable to expect that the MTase of some Type II RM systems could have a broader specificity  
611 than the cognate REase, such cases appear to be relatively rare.

612 The above results notwithstanding, we observed several cases of apparent off-target activity,  
613 by either or both of the MTase and the MFRE. In all such cases we observed (notably in *Halorubrum*  
614 sp. BOL3-1 and *N. meningitidis* 95-134, discussed in Results), the off-target sites are asymmetric.  
615 For such sites to appear at appreciable frequency in the data, they must be cleaved on both sides of  
616 the site by the MFRE. This implies that (1) these sites are methylated on both strands, and (2) the  
617 sequences on both strands conform to the recognition site of the MFRE. Type II MTases typically act  
618 as monomers, methylating both strands independently. Asymmetric sequences typically require two  
619 MTases to achieve full methylation, so whether and how these off-target sequences are being  
620 methylated is at present unclear.

621 Furthermore, in the case of *Halorubrum* sp. BOL3-1, one of the asymmetric sites,  
622 GTCGAG/CTCGAC, should be cleavable by MspJI on only one side, even if methylated on both  
623 strands. The CTCGAC strand does not fit the CNNR pattern recognized by MspJI. We observed off-  
624 target cleavage by FspEI as well, in the case of *Deinococcus radiodurans*. MspJI cleavage discovers  
625 the motif YCGCGR, with all four non-degenerate sequences represented in roughly equal fractions.  
626 Cleavage with FspEI should result in the apparent motif CCGCGG due to the MFRE's cleavage  
627 requirements. However, we observed significant off-target activity at CCGCGA/TCGCGG sites  
628 (1,651/5,277 = 31.3%), one strand of which should not be cleavable. The nature of this activity is  
629 likewise unclear, but further examination may shed further insight into the cleavage requirements of  
630 MFREs. We are at present examining the phenomenon of "off-target" activity further.

631 Poor detection of sites by MFRE-Seq can be due either to low levels of methylation in the  
632 genome or to low numbers of sites. For example, the genome of *Anabaena variabilis* ATCC 27893  
633 encodes four R-M systems with associated m5C MTases: M.AvaII (GGWCC), M.AvaIVP (predicted  
634 GCTNAGC, but possibly inactive), M.AvaVIII (CGATCG), and M.AvaIX (RCCGGY) (16). Using  
635 MFRE-Seq, we detected two of these motifs in the genomic DNA, RCCGGY and CGATCG, but a  
636 third motif (GGWCC) was detectable only in an *E. coli* clone overexpressing M.AvaII, suggesting poor  
637 methylation in the native host. The CGATCG motif was detectable only with FspEI and manifested as

638 VCGAYCGS, from which CGATCG was determined by parsing all 12 possible degenerate instances  
639 of this site (Table 7). The reason this site was so difficult to detect was that FspEI cleavage  
640 requirements restricted cutting primarily to CCGATCGG sites, for which there are only 4 in the entire  
641 genome (Table 5). The reason the motif was detected at all was due primarily to, again, off-target  
642 activity by FspEI at CCGATCGC/GCGATCGG sites (Table 7).

643

644 **Table 7.** Read data for M.AvaVIII.<sup>a</sup>

645

| Motif    | Sites in genome | Fraction | Reads Identified | Fraction Identified |
|----------|-----------------|----------|------------------|---------------------|
| VCGAYCGS | 6,002           | 1.000    | 119              | 0.020               |
| ACGACCGC | 21              | 0.003    | 0                | 0.000               |
| CCGACCGC | 18              | 0.003    | 1                | 0.056               |
| GCGACCGC | 23              | 0.004    | 0                | 0.000               |
| ACGATCGC | 300             | 0.050    | 1                | 0.003               |
| CCGATCGC | 165             | 0.027    | 35               | 0.212               |
| GCGATCGC | 5,268           | 0.878    | 43               | 0.008               |
| ACGACCGG | 16              | 0.003    | 0                | 0.000               |
| CCGACCGG | 16              | 0.003    | 0                | 0.000               |
| GCGACCGG | 11              | 0.002    | 0                | 0.000               |
| ACGATCGG | 3               | 0.000    | 1                | 0.333               |
| CCGATCGG | 4               | 0.001    | 4                | 1.000               |
| GCGATCGG | 157             | 0.026    | 34               | 0.217               |

646

647 <sup>a</sup> Fraction = fraction of the 6002 VCGAYCGS sites that each motif represents. Reads identified =  
648 number of unique (16,16) reads identified from each motif. Fraction identified = fraction of all  
649 sites in the genome for which a (16,16) read was identified.

650

651 The accuracy of MFRE-Seq depends on the availability of a set of methylated examples that  
652 is both sufficiently large and unbiased. Our randomization tests show that, at the level of “non-CCMD  
653 reads” we typically see, on the order of 50 examples or fewer are needed. In an unbiased sequence,  
654 a fully specified 8 bp motif should occur about 50 times in a 3.3 Mbp genome, meaning even the  
655 longest known motifs should be detectable by MFRE-Seq. That said, genomes are not random  
656 sequences, but can have significant biases for or against specific *k*-mers. The case of *A. variabilis*  
657 mentioned above is an extreme example: there are 5,268 GCGATCGC sites, but only 4 CCGATCGG  
658 sites. All methods of determining sequence motifs suffer equally from this same difficulty. Although

659 this challenge can be overcome by testing batteries of equally frequent sites, this type of experiment  
660 is beyond the scope of this work.

661 The method we have described here, which we term MFRE-Seq, has both advantages and  
662 disadvantages relative to other methods for motif determination. The primary advantage is ease of  
663 use, in that it requires only REase digestion of the DNA sample prior to library preparation, as  
664 opposed to damaging sodium bisulfite chemical treatment. It is compatible with both Ion Torrent and  
665 Illumina sequencing platforms; SMRT sequencing of the fragments is not recommended due to the  
666 very short nature of the MFRE-derived library inserts. Processing of sequence data to derive motifs  
667 is also straightforward. We have presented one possible method, namely identifying CCMD reads  
668 and deriving the motif by simple alignment. However, other methods could easily be used instead,  
669 including searching for overrepresented sequences using MEME (32) or Mosdi (42), building motifs  
670 from probable m5C sites using MotifMaker, and other methods.

671 We have used this method in conjunction with a reference sequence, using exact matching of  
672 sequence reads as a filtering step to remove reads with potential errors and reads derived from non-  
673 reference sources. After reducing sequence reads derived from unproductive sources such as the  
674 activator oligonucleotide and molecular weight markers (see Results), the fraction of reads not exactly  
675 matching the reference has tended to be low. In our experiments with *E. coli* DHB4, performed after  
676 these steps were implemented, more than 96% of reads were exact matches to the reference (Table  
677 1), so it may also be possible to use MFRE-Seq in the absence of a reference, perhaps using read  
678 copy number as a filtering step.

679 While MFRE-Seq has important advantages over bisulfite-based methods, there are certain  
680 types of methylated sites that are either not straightforward or impossible for it to identify. Sites that  
681 are not straightforward are nonpalindromic sites and hemi-methylated sites. Nonpalindromic sites  
682 that are cleavable on both strands by one or more MFREs will, using the motif-determination method  
683 described here, generate degenerate motifs that represent the average of the motif sequences on the  
684 two strands. Deconvolution of this data by examining the representation of each non-degenerate  
685 instance will make the true site apparent, and we did this successfully in the case of Acil (methylated  
686 at CCGC). Hemi-methylated sites are in theory discoverable, but since they are cut by the MFRE on

687 only one side, an alternative motif-searching method must be used. It should be noted that some R-  
688 M systems rely on two separate MTases to methylate both strands of an asymmetric site. Those  
689 cases where one of those MTases is either m6A or m4C are, for the purposes of MFRE-Seq,  
690 considered hemi-methylated, as they are methylated at m5C on only one strand.

691 Those methylated sites (whether palindromic, nonpalindromic, or hemi-methylated) that are  
692 at present impossible to identify are those that do not conform to the recognition sites of the available  
693 MFREs, which as of this writing comprises MspJI, FspEI, and LpnPI. (We did nonetheless identify a  
694 small number of such sites in our data, presumably due to off-target activity by the MFREs, but such  
695 cases appear to be rare.) Table S6 shows all known m5C DNA MTase recognition sites found in  
696 REBASE and their MFRE cleavage properties. There are 100 different sites, of which 72 are  
697 palindromic and 82 are m5C-methylated on both strands, making them discoverable with MFRE-Seq  
698 using the computational method described here. 68 of the 82 are cleavable with either MspJI or  
699 FspEI. However, in many cases only a subset of instances of the site can be cleaved due to the  
700 MFRE's own recognition properties. For examples, GATC sites are only cleavable by MspJI when  
701 they fit the profile YNNGATC<sup>u</sup>NNR, and CATG sites are only cleavable by FspEI when they fit the  
702 profile CCATGG. MFRE recognition sites need to be taken into account to avoid over-specification of  
703 MTase motifs.

704 Identification and characterization of additional MFRE family members with orthogonal  
705 specificities should help overcome this limitation, and this work is currently in progress. In the  
706 meantime, MFRE-Seq has already identified numerous new recognition sites and methylated bases  
707 within known sites, and it serves as a useful complement to other methods of m5C motif  
708 determination.

709  
710

**Table 4.** Motifs determined using the Illumina MiSeq platform.<sup>a</sup>

| Sample                                          | Enz | Plex | Merged Ref | Motif(s)                                 | Sites Detected                              | % Detected          |
|-------------------------------------------------|-----|------|------------|------------------------------------------|---------------------------------------------|---------------------|
| <i>E. coli</i> DHB4                             | F   | 2    | 7,657,629  | <u>CCWGG</u>                             | 11,625/12,321                               | 94.3                |
| <i>Acinetobacter calcoaceticus</i><br>ATCC49823 | M   | 8    | 39,168     | <u>CGCG</u><br><u>GATC</u>               | 1,351/2,503<br>821/11,706 (736/2,719)       | 54.0<br>7.0 (27.1)  |
| <i>Halorubrum</i> sp. BOL3-1                    | M   | 6    | 279,772    | <u>CTCGAG</u><br><u>TGCA</u>             | 533/560<br>452/1,029                        | 95.2<br>43.9        |
| M.HhaI clone <sup>c</sup>                       | M   | 9    | 1,259,223  | <u>CCWGG</u><br><u>GCGC</u> <sup>b</sup> | 10,021/11,936<br>6,219/32,532 (4,626/8,173) | 84.0<br>19.1 (56.6) |
| <i>Anabaena variabilis</i><br>ATCC27893         | M   | 9    | 432,800    | <u>RCCGGY</u>                            | 1,168/1,311                                 | 89.1                |
| <i>Anabaena variabilis</i><br>ATCC27893         | F   | 9    | 585,880    | <u>CGATCG</u> <sup>b</sup> (weak)        | 240/6,354 (4/4)                             | 3.8 (100)           |
| M.AvaI clone                                    | M   | 9    | 2,845      | <u>GGWCC</u> <sup>b</sup>                | 273/2,792 (103/303)                         | 9.8 (100)           |

711  
712  
713  
714  
715  
716  
717  
718

<sup>a</sup> Enz = enzyme used for digestion (M = MspJI, F = FspEI, L = LpnPI). Plex = number of multiplexed samples in this run. Merg ref = total number of merged reads exactly matching the reference. Sites detected = fraction of all sites in the genome for which (16,16) reads were detected in the sequence data.

<sup>b</sup> Additional bases called outside recognition sequence due to cutting constraints. Sites and % detected are reported for the site as written, followed by the results for the “constrained” site (e.g., YTCGAR is the “constrained” version of TCGA for a MspJI-cleaved library) in parentheses.

<sup>c</sup> The *E. coli* strain used for this clone was Dcm<sup>+</sup>, resulting in the discovery of both the Dcm and M.HhaI motifs.

719  
720

**Table 5.** Motifs determined using the Ion Torrent platform.<sup>a</sup>

| Sample                                       | Enz | Plex | Merged Ref | Motif(s)                                                                                    | Sites Detected                                              | % Detected                                 |
|----------------------------------------------|-----|------|------------|---------------------------------------------------------------------------------------------|-------------------------------------------------------------|--------------------------------------------|
| <i>Xanthomonas badrii</i>                    | M   | 8    | 39400      | CR <u>CCGG</u> YG                                                                           | 1,201/3,757                                                 | 32.0                                       |
| <i>Pseudomonas mendocina</i>                 | M   | 6    | 84413      | GG <u>WCC</u> <sup>b</sup>                                                                  | 260/956 (71/98)                                             | 27.2 (72.4)                                |
| <i>Bermanella marisrubri</i> RED65           | MFL | 8    | 10023      | CC <u>WGG</u>                                                                               | 1,628/2,676                                                 | 60.8                                       |
| <i>Pseudomonas</i> sp. OM2164                | MFL | 8    | 127746     | CC <u>WGG</u>                                                                               | 5,897/6,751                                                 | 87.4                                       |
| <i>Moraxella</i> sp. ATCC 49670              | MF  | 8    | 302550     | CC <u>GG</u>                                                                                | 7,411/9,288                                                 | 79.8                                       |
| <i>Rhodobacter sphaeroides</i> 2.4.1         | MF  | 8    | 40618      | CGAT <u>CG</u> <sup>b</sup>                                                                 | 184/2,152 (132/144)                                         | 8.6 (91.7)                                 |
| <i>Rhodobacter sphaeroides</i> CH10          | MF  | 8    | 14435      | CGAT <u>CG</u> <sup>b</sup>                                                                 | 147/2,154 (113/144)                                         | 6.8 (78.5)                                 |
| <i>Neisseria meningitidis</i> 95/134         | M   | 8    | 235919     | G <u>CRYGC</u> GGN <u>NCC</u> <sup>b</sup><br>CC <u>WGG</u> <sup>d</sup> /<br>CC <u>WGA</u> | 1,208/3,048<br>405/1,762 (306/501)<br>587/768<br>841/6,971  | 39.6<br>23.0 (61.1)<br>76.4<br>12.1        |
| <i>Neisseria meningitidis</i> 95/134         | F   | 8    | 195751     | CC <u>WGG</u> <sup>d</sup>                                                                  | 648/768                                                     | 84.4                                       |
| <i>Sulfurimonas denitrificans</i><br>DSM1251 | M   | 8    | 66713      | CG <u>CG</u><br>CC <u>NGG</u><br>GAT <u>C</u> <sup>b</sup><br>CC <u>GG</u> <sup>b</sup>     | 350/413<br>685/748<br>395/1,846 (260/389)<br>47/157 (14/42) | 84.7<br>91.6<br>21.4 (66.8)<br>29.9 (33.3) |
| <i>Sulfurimonas denitrificans</i><br>DSM1251 | F   | 8    | 56919      | CC <u>GG</u>                                                                                | 133/157                                                     | 84.7                                       |
| <i>Deinococcus radiodurans</i>               | M   | 8    | 124281     | Y <u>CGCGR</u>                                                                              | 3,601/5,878                                                 | 61.3                                       |
| <i>Deinococcus radiodurans</i>               | F   | 8    | 99275      | Y <u>CGCGR</u> <sup>c</sup>                                                                 | 1,908/5,878 (252/262)                                       | 32.5 (96.2)                                |
| <i>Bacillus stearothermophilus</i><br>CPW16  | M   | 11   | 484558     | R <u>CCGGY</u>                                                                              | 3,050/8,133                                                 | 37.5                                       |
| <i>Anabaena flos-aquae</i> CCAP<br>1403/13f  | M   | 11   | 56627      | GG <u>NCC</u> <sup>b</sup><br>R <u>CCGGY</u>                                                | 552/1,897 (303/409)<br>743/1,039                            | 29.1 (74.1)<br>71.5                        |
| <i>Anabaena flos-aquae</i> CCAP<br>1403/13f  | F   | 11   | 36167      | GG <u>NCC</u>                                                                               | 1,141/1,897                                                 | 60.1                                       |
| <i>Pseudomonas maltophilia</i>               | M   | 11   | 271315     | CAC <u>GTG</u>                                                                              | 1,145/1,266                                                 | 90.4                                       |

|                                              |    |    |        |                                      |                                   |                     |
|----------------------------------------------|----|----|--------|--------------------------------------|-----------------------------------|---------------------|
| <i>Pseudomonas maltophilia</i>               | F  | 11 | 119489 | RCCWGGY                              | 5,805/10,467                      | 55.5                |
| <i>Streptococcus cremoris</i> F              | M  | 11 | 291742 | CCN <u>GG</u>                        | 2,348/20,379                      | 11.5                |
| <i>Streptococcus cremoris</i> F              | F  | 11 | 377335 | CCN <u>GG</u>                        | 1,937/20,379                      | 9.5                 |
| <i>Bacillus</i> sp. N3536                    | M  | 11 | 44019  | GATC <sup>b</sup>                    | 253/8,622 (153/1,695)             | 2.9 (9.0)           |
| <i>Bifidobacterium kashiwanohense</i> APCKJ1 | M  | 11 | 166554 | CCW <u>GG</u>                        | 2,545/3,412                       | 74.6                |
| <i>Bifidobacterium kashiwanohense</i> APCKJ1 | F  | 11 | 174303 | CCW <u>GG</u>                        | 3,073/3,412                       | 90.1                |
| <i>Bacillus megaterium</i> S2                | M  | 11 | 228420 | GATC <sup>b</sup><br>GCTAGC          | 2,423/18,633 (362/803)<br>405/563 | 13.0 (45.1)<br>71.9 |
| <i>Aeromonas hydrophila</i>                  | F  | 11 | 3457   | GCC <u>G</u> GC                      | 125/6,991                         | 1.8                 |
| <i>Agrobacterium gelatinovorum</i>           | M  | 5  | 592703 | CCW <u>GG</u><br>ACCGGT <sup>c</sup> | 3,295/4,587<br>494/2,037          | 71.8<br>24.3        |
| <i>Agrobacterium gelatinovorum</i>           | F  | 5  | 270012 | CCW <u>GG</u>                        | 271/4,587 (133/174)               | 5.9 (76.4)          |
| <i>Arthrobacter citreus</i> NEB577           | MF | 4  | 352337 | CCGC <sup>b,e</sup>                  | 320/8,549 (304/1,324)             | 3.7 (23.0)          |
| <i>Arthrobacter</i> sp. NEB688               | M  | 4  | 13718  | AGCT <sup>b</sup>                    | 290/13,771 (263/5,523)            | 2.1 (5.2)           |

721

722

723

724

725

726

727

728

729

730

731

<sup>a</sup> Enz = enzyme used for digestion (M = MspJI, F = FspEI, L = LpnPI; some digests were performed with more than one enzyme in combination).

Plex = number of multiplexed samples in this run. Merged ref = total number of merged reads exactly matching the reference. Sites detected = fraction of all sites in the genome for which (16,16) or (16,17) reads were detected in the sequence data.

<sup>b</sup> Additional bases called outside recognition sequence due to cutting constraints. Sites and % detected are reported for the site as written, followed by the results for the “constrained” site (e.g., YTCGAR is the “constrained” version of TCGA for a MspJI-cleaved library) in parentheses.

<sup>c</sup> Requires off-target cleavage by the MFRE.

<sup>d</sup> This motif appears as the combination CCWGG and CCWGA.

<sup>e</sup> Due to its non-palindromic nature, this motif appears as SCSGS, with methylation exclusively at CCCG sites. The extra C appears due to cleavage constraints by FspEI and MspJI.

## ACKNOWLEDGMENTS

We thank Mehmet Berkmen, Francesca Bottacini, Priya and Shil DasSarma, Christopher D. Johnston, Katherine P. Lemon, Richard D. Morgan, Bianca Stenmark, and Jill Zeilstra for providing strains, genomic DNA, and/or clones for analysis. The authors would also like to thank Don Comb for support.

## REFERENCES

1. Sanchez-Romero MA, Cota I, Casadesus J. DNA methylation in bacteria: from the methyl group to the methylome. *Curr Opin Microbiol.* 2015;25:9-16.
2. Roberts RJ, Belfort M, Bestor T, Bhagwat AS, Bickle TA, Bitinaite J, et al. A nomenclature for restriction enzymes, DNA methyltransferases, homing endonucleases and their genes. *Nucleic Acids Res.* 2003;31(7):1805-12.
3. Jones PA. Functions of DNA methylation: islands, start sites, gene bodies and beyond. *Nat Rev Genet.* 2012;13(7):484-92.
4. Smith ZD, Meissner A. DNA methylation: roles in mammalian development. *Nat Rev Genet.* 2013;14(3):204-20.
5. Fu Y, Luo GZ, Chen K, Deng X, Yu M, Han D, et al. N6-methyldeoxyadenosine marks active transcription start sites in *Chlamydomonas*. *Cell.* 2015;161(4):879-92.
6. Greer EL, Blanco MA, Gu L, Sendinc E, Liu J, Aristizabal-Corrales D, et al. DNA Methylation on N6-Adenine in *C. elegans*. *Cell.* 2015;161(4):868-78.
7. Liang Z, Shen L, Cui X, Bao S, Geng Y, Yu G, et al. DNA N(6)-Adenine Methylation in *Arabidopsis thaliana*. *Dev Cell.* 2018;45(3):406-16 e3.
8. Mondo SJ, Dannebaum RO, Kuo RC, Louie KB, Bewick AJ, LaButti K, et al. Widespread adenine N6-methylation of active genes in fungi. *Nat Genet.* 2017;49(6):964-8.



9. Xiao CL, Zhu S, He M, Chen, Zhang Q, Chen Y, et al. N(6)-Methyladenine DNA Modification in the Human Genome. *Mol Cell*. 2018;71(2):306-18 e7.
10. Ehrlich M, Gama-Sosa MA, Huang LH, Midgett RM, Kuo KC, McCune RA, et al. Amount and distribution of 5-methylcytosine in human DNA from different types of tissues of cells. *Nucleic Acids Res*. 1982;10(8):2709-21.
11. Henderson IR, Jacobsen SE. Epigenetic inheritance in plants. *Nature*. 2007;447(7143):418-24.
12. Law JA, Jacobsen SE. Establishing, maintaining and modifying DNA methylation patterns in plants and animals. *Nat Rev Genet*. 2010;11(3):204-20.
13. Lobner-Olesen A, Skovgaard O, Marinus MG. Dam methylation: coordinating cellular processes. *Curr Opin Microbiol*. 2005;8(2):154-60.
14. Militello KT, Mandarano AH, Varchtchouk O, Simon RD. Cytosine DNA methylation influences drug resistance in *Escherichia coli* through increased *sugE* expression. *FEMS Microbiol Lett*. 2014;350(1):100-6.
15. Collier J. Epigenetic regulation of the bacterial cell cycle. *Curr Opin Microbiol*. 2009;12(6):722-9.
16. Roberts RJ, Vincze T, Posfai J, Macelis D. REBASE--a database for DNA restriction and modification: enzymes, genes and genomes. *Nucleic Acids Res*. 2015;43(Database issue):D298-9.
17. Ringquist S, Smith CL. The *Escherichia coli* chromosome contains specific, unmethylated *dam* and *dcm* sites. *Proc Natl Acad Sci U S A*. 1992;89(10):4539-43.
18. Hale WB, van der Woude MW, Low DA. Analysis of nonmethylated GATC sites in the *Escherichia coli* chromosome and identification of sites that are differentially methylated in response to environmental stimuli. *J Bacteriol*. 1994;176(11):3438-41.
19. Blow MJ, Clark TA, Daum CG, Deutschbauer AM, Fomenkov A, Fries R, et al. The Epigenomic Landscape of Prokaryotes. *PLoS Genet*. 2016;12(2):e1005854.

20. Payelleville A, Legrand L, Ogier JC, Roques C, Roulet A, Bouchez O, et al. The complete methylome of an entomopathogenic bacterium reveals the existence of loci with unmethylated Adenines. *Sci Rep.* 2018;8(1):12091.
21. Dugaiczuk A, Hedgpeth J, Boyer HW, Goodman HM. Physical identity of the SV40 deoxyribonucleic acid sequence recognized by the Eco RI restriction endonuclease and modification methylase. *Biochemistry.* 1974;13(3):503-12.
22. Flusberg BA, Webster DR, Lee JH, Travers KJ, Olivares EC, Clark TA, et al. Direct detection of DNA methylation during single-molecule, real-time sequencing. *Nat Methods.* 2010;7(6):461-5.
23. Clark TA, Lu X, Luong K, Dai Q, Boitano M, Turner SW, et al. Enhanced 5-methylcytosine detection in single-molecule, real-time sequencing via Tet1 oxidation. *BMC Biol.* 2013;11:4.
24. Roberts RJ, Carneiro MO, Schatz MC. The advantages of SMRT sequencing. *Genome Biol.* 2013;14(7):405.
25. Lee WC, Anton BP, Wang S, Baybayan P, Singh S, Ashby M, et al. The complete methylome of *Helicobacter pylori* UM032. *BMC Genomics.* 2015;16:424.
26. Krebs J, Morgan RD, Bunk B, Sproer C, Luong K, Parusel R, et al. The complex methylome of the human gastric pathogen *Helicobacter pylori*. *Nucleic Acids Res.* 2014;42(4):2415-32.
27. Frommer M, McDonald LE, Millar DS, Collis CM, Watt F, Grigg GW, et al. A genomic sequencing protocol that yields a positive display of 5-methylcytosine residues in individual DNA strands. *Proc Natl Acad Sci U S A.* 1992;89(5):1827-31.
28. Kahramanoglou C, Prieto AI, Khedkar S, Haase B, Gupta A, Benes V, et al. Genomics of DNA cytosine methylation in *Escherichia coli* reveals its role in stationary phase transcription. *Nat Commun.* 2012;3:886.
29. Huo W, Adams HM, Zhang MQ, Palmer KL. Genome Modification in *Enterococcus faecalis* OG1RF Assessed by Bisulfite Sequencing and Single-Molecule Real-Time Sequencing. *J Bacteriol.* 2015;197(11):1939-51.

30. Huo W, Adams HM, Trejo C, Badia R, Palmer KL. A Type I Restriction-Modification System Associated with *Enterococcus faecium* Subspecies Separation. *Appl Environ Microbiol.* 2019;85(2).
31. Johnston CD, Skeete CA, Fomenkov A, Roberts RJ, Rittling SR. Restriction-modification mediated barriers to exogenous DNA uptake and incorporation employed by *Prevotella intermedia*. *PLoS One.* 2017;12(9):e0185234.
32. Bailey TL, Williams N, Misleh C, Li WW. MEME: discovering and analyzing DNA and protein sequence motifs. *Nucleic Acids Res.* 2006;34(Web Server issue):W369-73.
33. Cohen-Karni D, Xu D, Apone L, Fomenkov A, Sun Z, Davis PJ, et al. The MspJI family of modification-dependent restriction endonucleases for epigenetic studies. *Proc Natl Acad Sci U S A.* 2011;108(27):11040-5.
34. Shinozuka H, Cogan NO, Shinozuka M, Marshall A, Kay P, Lin YH, et al. A simple method for semi-random DNA amplicon fragmentation using the methylation-dependent restriction enzyme MspJI. *BMC Biotechnol.* 2015;15:25.
35. Petell CJ, Loiseau G, Gandy R, Pradhan S, Gowher H. A refined DNA methylation detection method using MspJI coupled quantitative PCR. *Anal Biochem.* 2017;533:1-9.
36. Yang Y, Yang G, Chen H, Zhang H, Feng JJ, Cai C. Electrochemical signal-amplified detection of 5-methylcytosine and 5-hydroxymethylcytosine in DNA using glucose modification coupled with restriction endonucleases. *Analyst.* 2018;143(9):2051-6.
37. Boers R, Boers J, de Hoon B, Kockx C, Ozgur Z, Molijn A, et al. Genome-wide DNA methylation profiling using the methylation-dependent restriction enzyme LpnPI. *Genome Res.* 2018;28(1):88-99.
38. Huang X, Lu H, Wang JW, Xu L, Liu S, Sun J, et al. High-throughput sequencing of methylated cytosine enriched by modification-dependent restriction endonuclease MspJI. *BMC Genet.* 2013;14:56.
39. Zheng Y, Cohen-Karni D, Xu D, Chin HG, Wilson G, Pradhan S, et al. A unique family of Mrr-like modification-dependent restriction endonucleases. *Nucleic Acids Res.* 2010;38(16):5527-34.

40. Butler D, Fitzgerald GF. Transcriptional analysis and regulation of expression of the ScrFI restriction-modification system of *Lactococcus lactis* subsp. *cremoris* UC503. *J Bacteriol.* 2001;183(15):4668-73.
41. Clark TA, Murray IA, Morgan RD, Kislyuk AO, Spittle KE, Boitano M, et al. Characterization of DNA methyltransferase specificities using single-molecule, real-time DNA sequencing. *Nucleic Acids Res.* 2012;40(4):e29.
42. Al-Ssulami AM, Azmi AM, Mathkour H. An efficient method for significant motifs discovery from multiple DNA sequences. *J Bioinform Comput Biol.* 2017;15(4):1750014.

## SUPPORTING INFORMATION

Text S1. Description of Data Sets S1 through S4.

Table S1. Base filtering of selected read structures containing CCWGG ( $L_2 = 31$ ) or CCWGG ( $L_4 = 29$ ).

Table S2. Number of (all / base-filtered) reads of various classes for lengths 30-32 bases.

Table S3. Reads from enzyme activator oligonucleotides.

Table S4. Summary of m5C motifs identified in Tables 4 and 5.

Table S5. REBASE nomenclature for motifs discovered or confirmed with MFRE-Seq.

Table S6. MFRE cleavage properties of all known m5C motifs.

Figure S1. Venn diagram of unrepresented sites from the four libraries of *E. coli* K-12 DHB4 described in Table 1 (with corresponding numbering). Figures show the number of loci common to one or more libraries.

Figure S2. Gel photo (20% TBE-PAGE stained with SYBR Gold) of MFRE digest reactions showing activator and cleavage bands. All reactions were MspJI (1  $\mu$ L) digests of *E. coli* DHB4 genomic DNA

with 0.525  $\mu$ M enzyme activator in 40  $\mu$ L 1x CutSmart buffer, 37°C 3 hrs. M = Low Molecular Weight DNA Ladder (New England Biolabs). Lanes 1-5 contained 3  $\mu$ g genomic DNA, and lanes 6-10 contained 1.5  $\mu$ g genomic DNA. Activators: none (lanes 1 and 6), standard activator (lanes 2 and 7), activator-N (lanes 3 and 8), activator-U (lanes 4 and 9), or activator-UN (lanes 5 and 10).

Figure S3. Examples of read distribution with 3 digest cleanup protocols. All 3 samples were digested with MspJI and sequenced on the Ion Torrent platform. A. One-step spin-column cleanup, which keeps all fragments, small and large; *Arthrobacter* sp., CCMD length = 34. B. Two-step spin-column cleanup, which selects for fragments < 100 bp; *E. coli* DHB4, CCMD length = 31. C. Gel-purification of small fragments (20-50 bp range) from 20% polyacrylamide; *E. coli* DHB4, CCMD length = 31.

Data Sets S1-S4. Compressed archives of processed MFRE-Seq FASTA files from which motifs in Tables 4 and 5 were derived.





m5C-methylated genomic DNA

motif with m5C positions

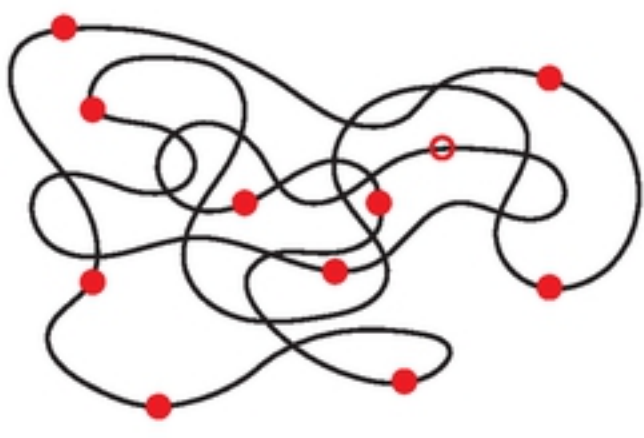

MFRE digestion

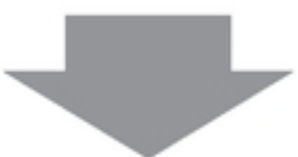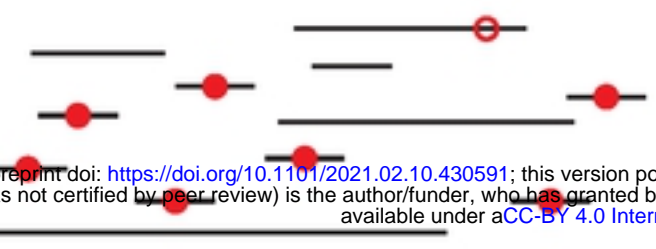

size selection

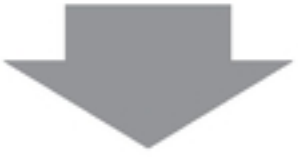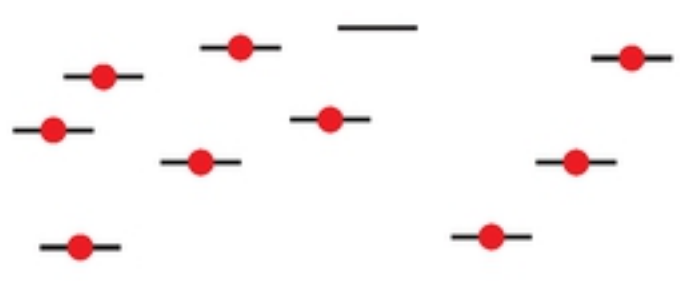

library preparation

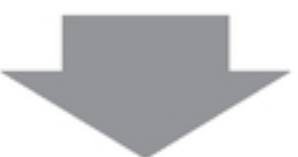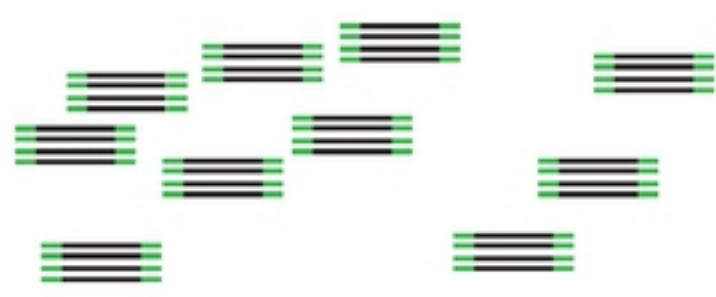

reference-filter reads and bin by length

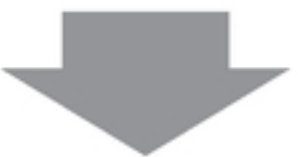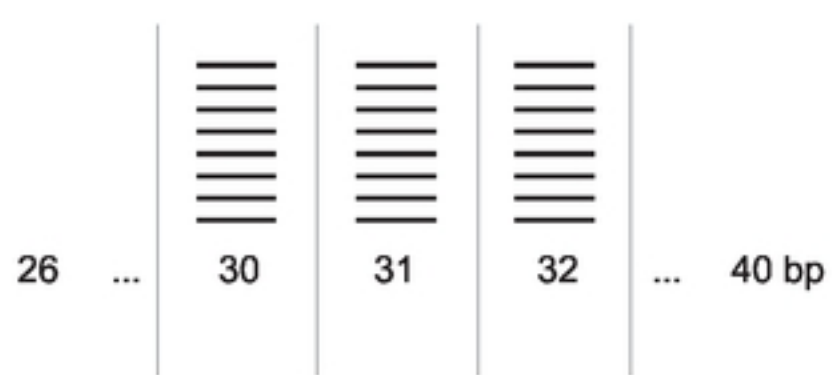

align reads in each bin

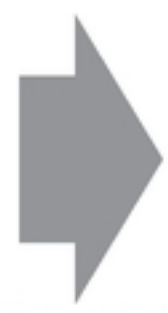

CCWGG

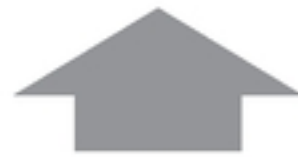

remove trailing N's

NNNNNNNNNNNNNNNNCCWGGNNNNNNNNNNNNNNNN

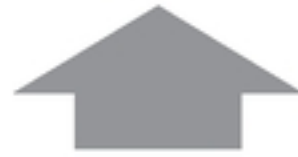

determine IUPAC of each column

CGATTGCGGGCGCC**CAGG**C**TTTGGT**CGGCC  
 TCACCGCTTGTGGC**CTGG**CCGTCAATTCCTT  
 ATGATGGCGGACTCCGGTGCCCGTGGTTCTG  
 CCCGCCAACAAAAC**CAGG**ACCAGCTCATTGT

CACACCGCCCTCGC**CAGGG**CCACGGATGTGG  
 CGCCATGCGTTTGC**CTGG**ACCCATGGTGTG

GGCGGCAACACAGC**CAGG**ACCGGGCGTGAAG  
 CTAAACCTGCTGTC**CAGG**ACCCGGGCATACC  
 GTCCGATTCCACGC**CTGG**CCCGACGATGGGG

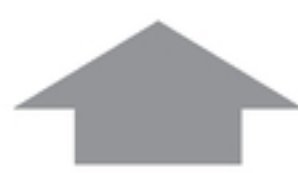

base-filter reads

CGATTGCGGGCGCC**CAGG**C**TTTGGT**CGGCC  
 TCACCGCTTGTGGC**CTGG**CCGTCAATTCCTT  
 ATGATGGCGGACTCCGGTGCCCGTGGTTCTG  
 CCCGCCAACAAAAC**CAGG**ACCAGCTCATTGT  
 GTTGGCTGCGGCC**CAGG**CCGAGGTTGTAGAT  
 CACACCGCCCTCGC**CAGGG**CCACGGATGTGG  
 CGCCATGCGTTTGC**CTGG**ACCCATGGTGTG  
 CGTAGCGCGTGATGCCCGGATGTGGCGGATA  
 GGCGGCAACACAGC**CAGG**ACCGGGCGTGAAG  
 CTAAACCTGCTGTC**CAGG**ACCCGGGCATACC  
 GTCCGATTCCACGC**CTGG**CCCGACGATGGGG

example: 31 bp reads

Figure 2

**A.**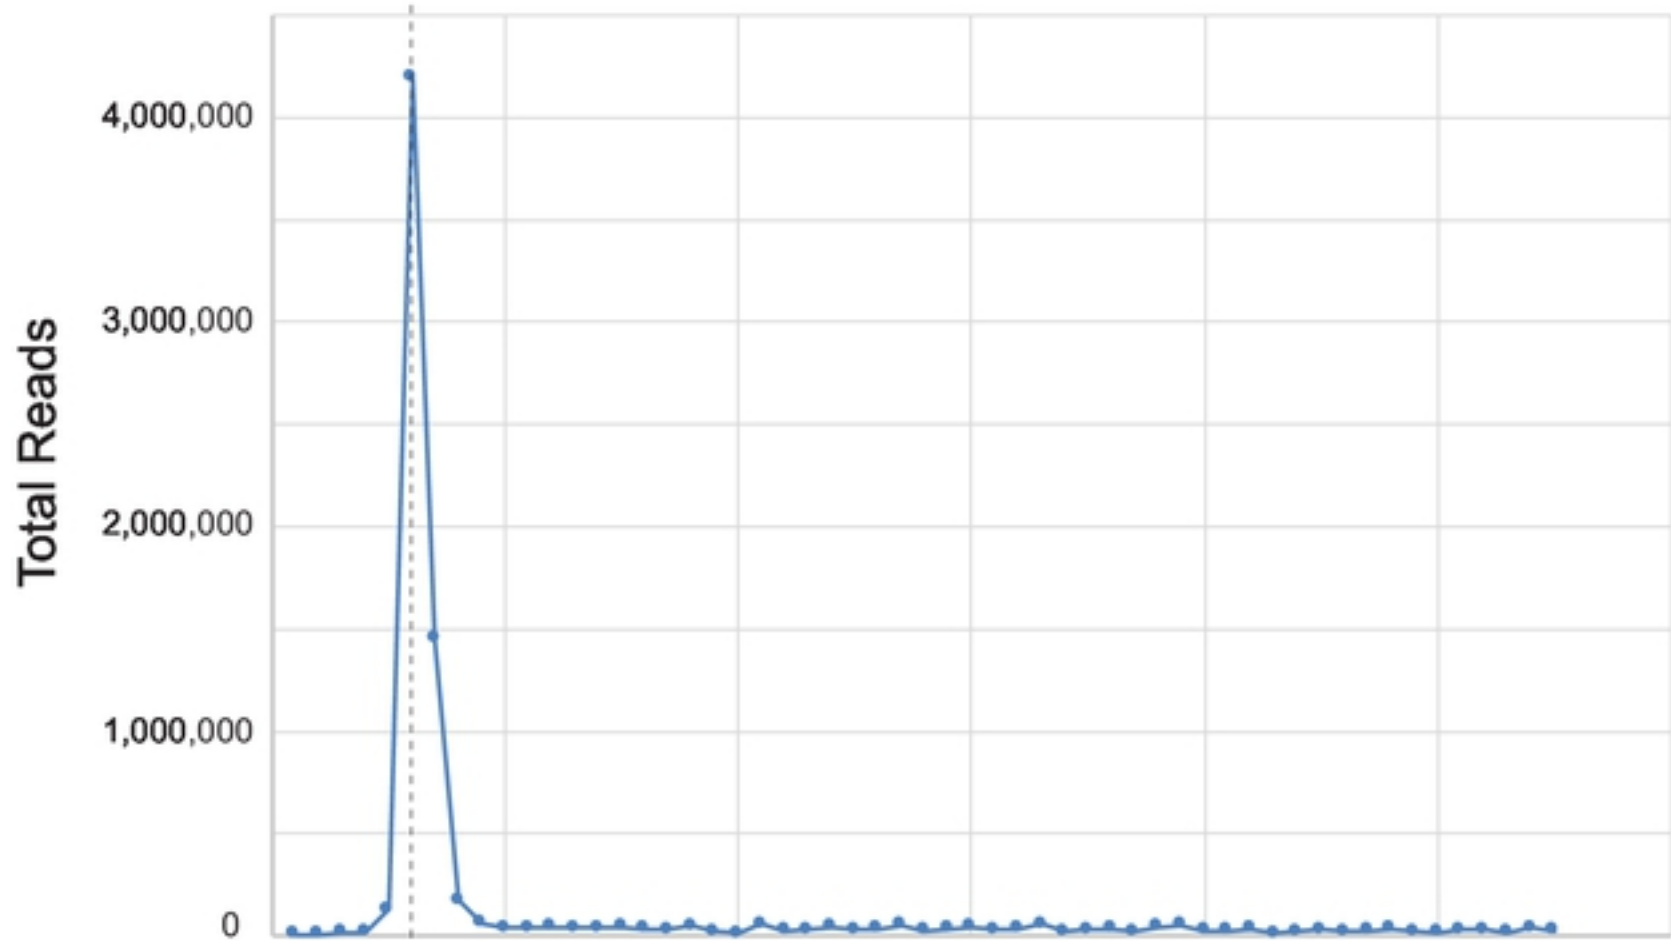**B.**

bioRxiv preprint doi: <https://doi.org/10.1101/2021.02.10.430591>; this version posted February 10, 2021. The copyright holder for this preprint (which was not certified by peer review) is the author/funder, who has granted bioRxiv a license to display the preprint in perpetuity. It is made available under a [CC-BY 4.0 International license](#).

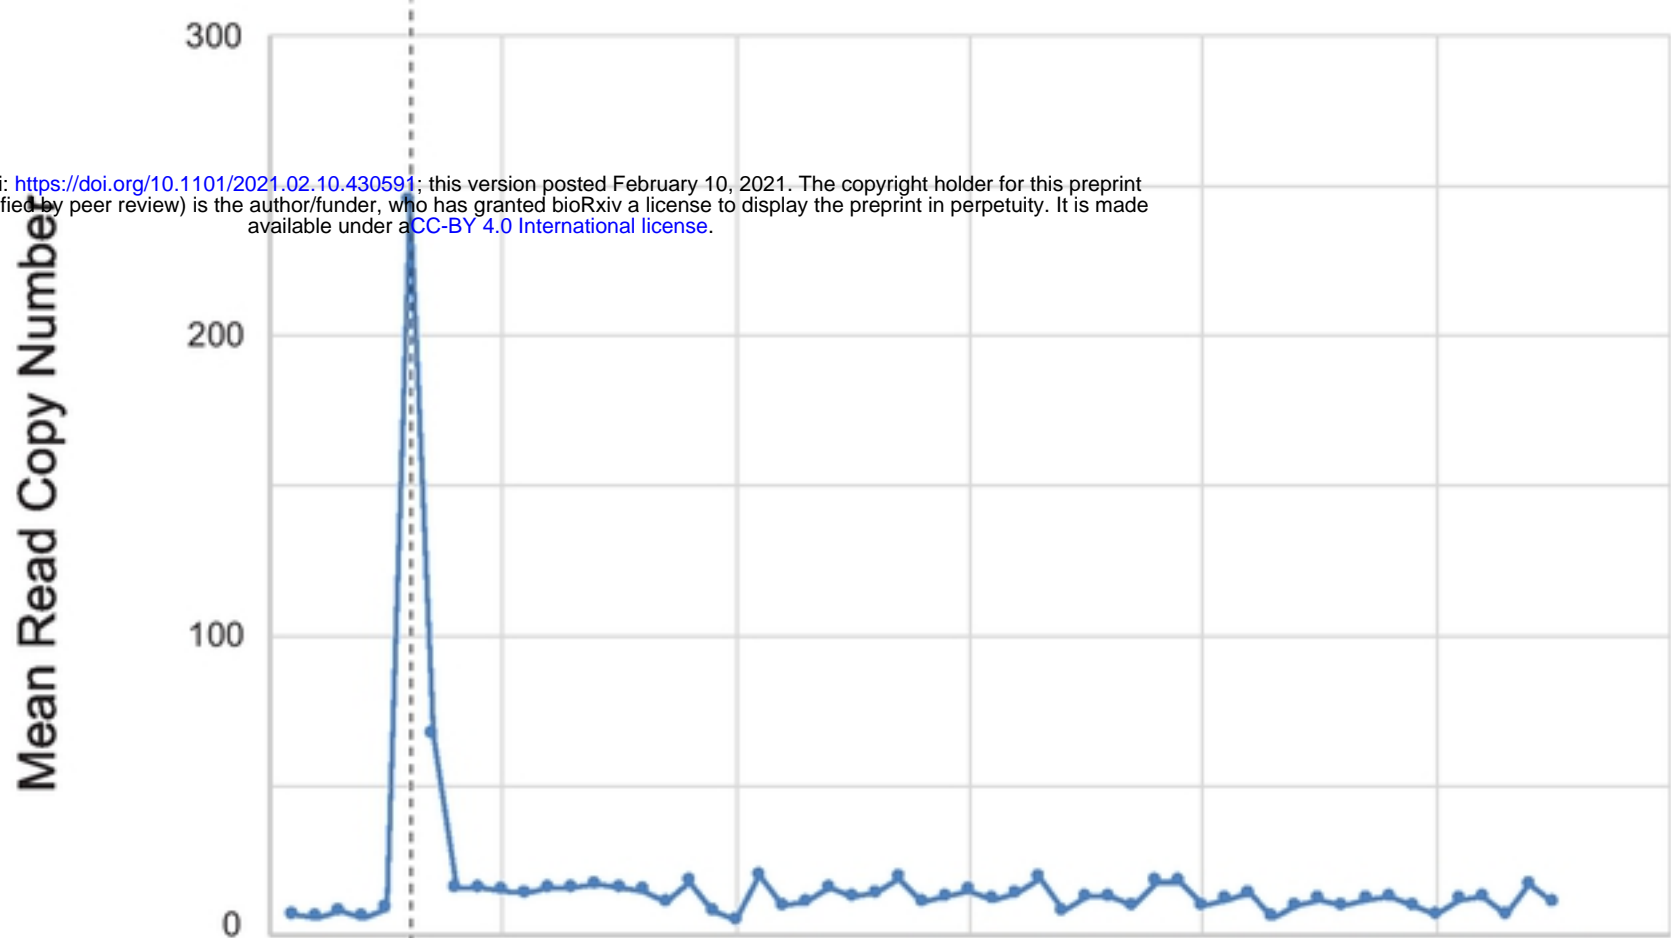**C.**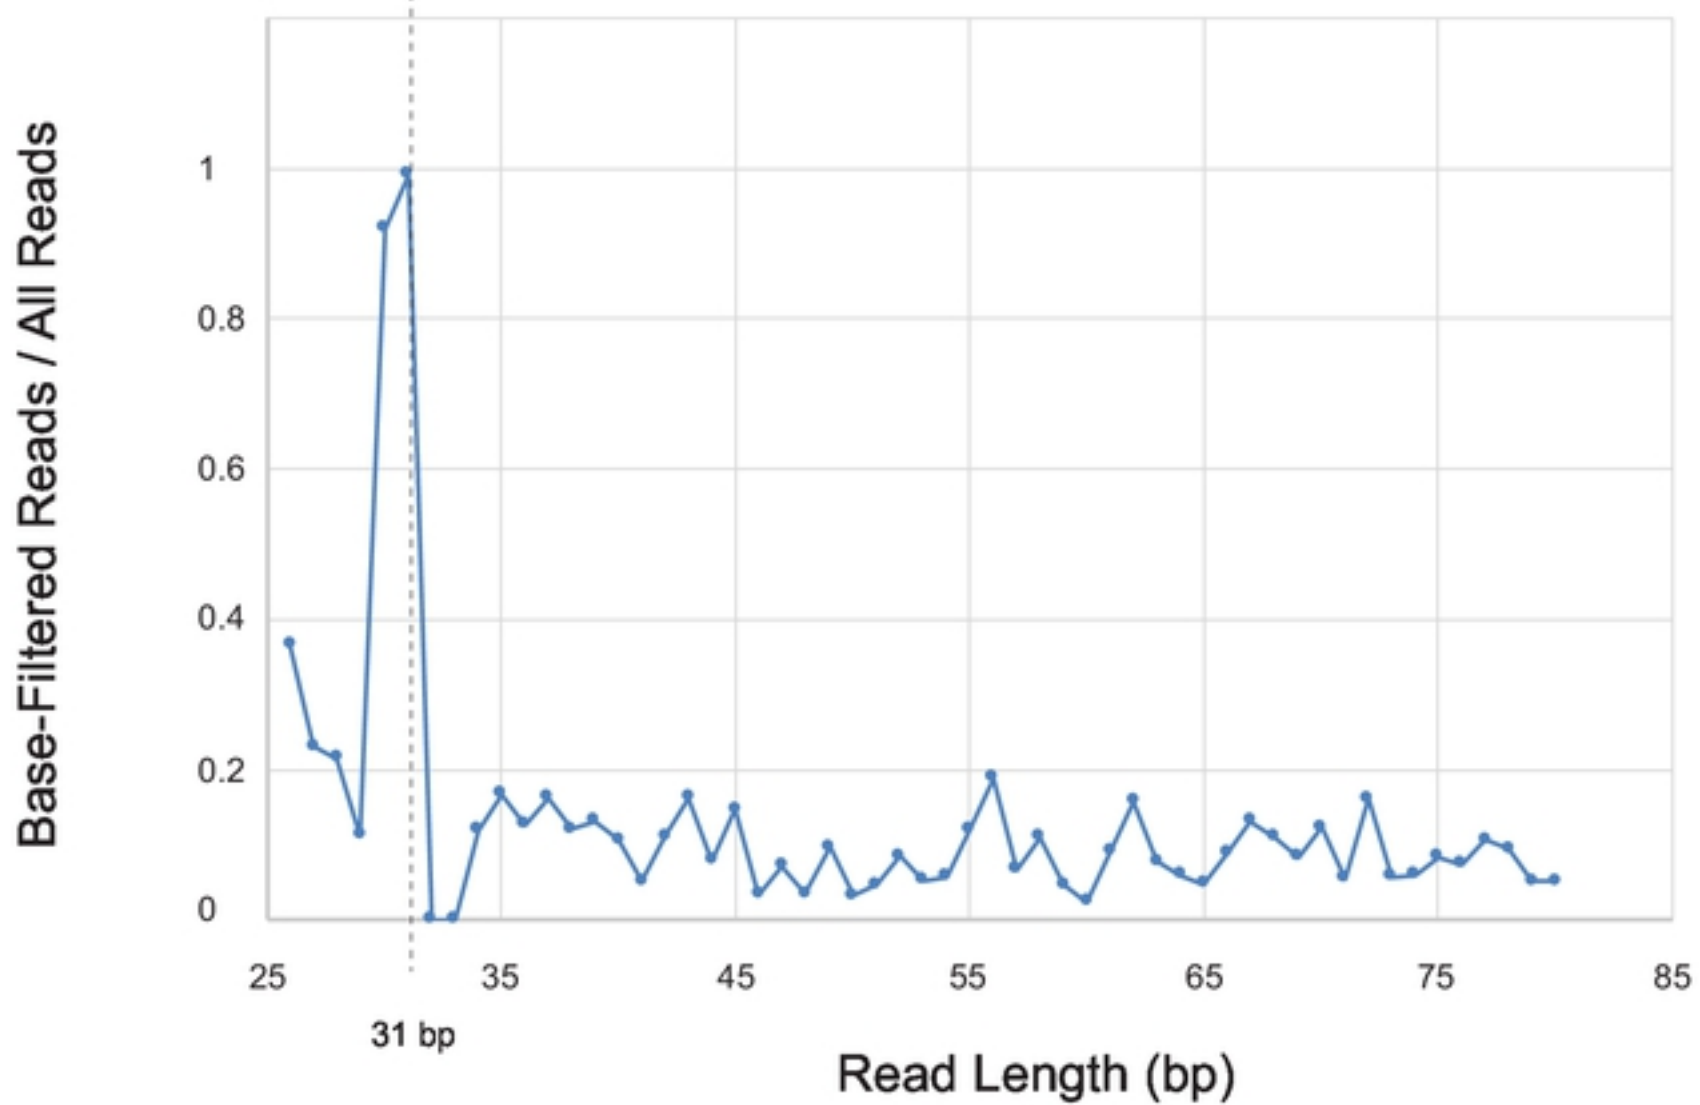**Figure 3**



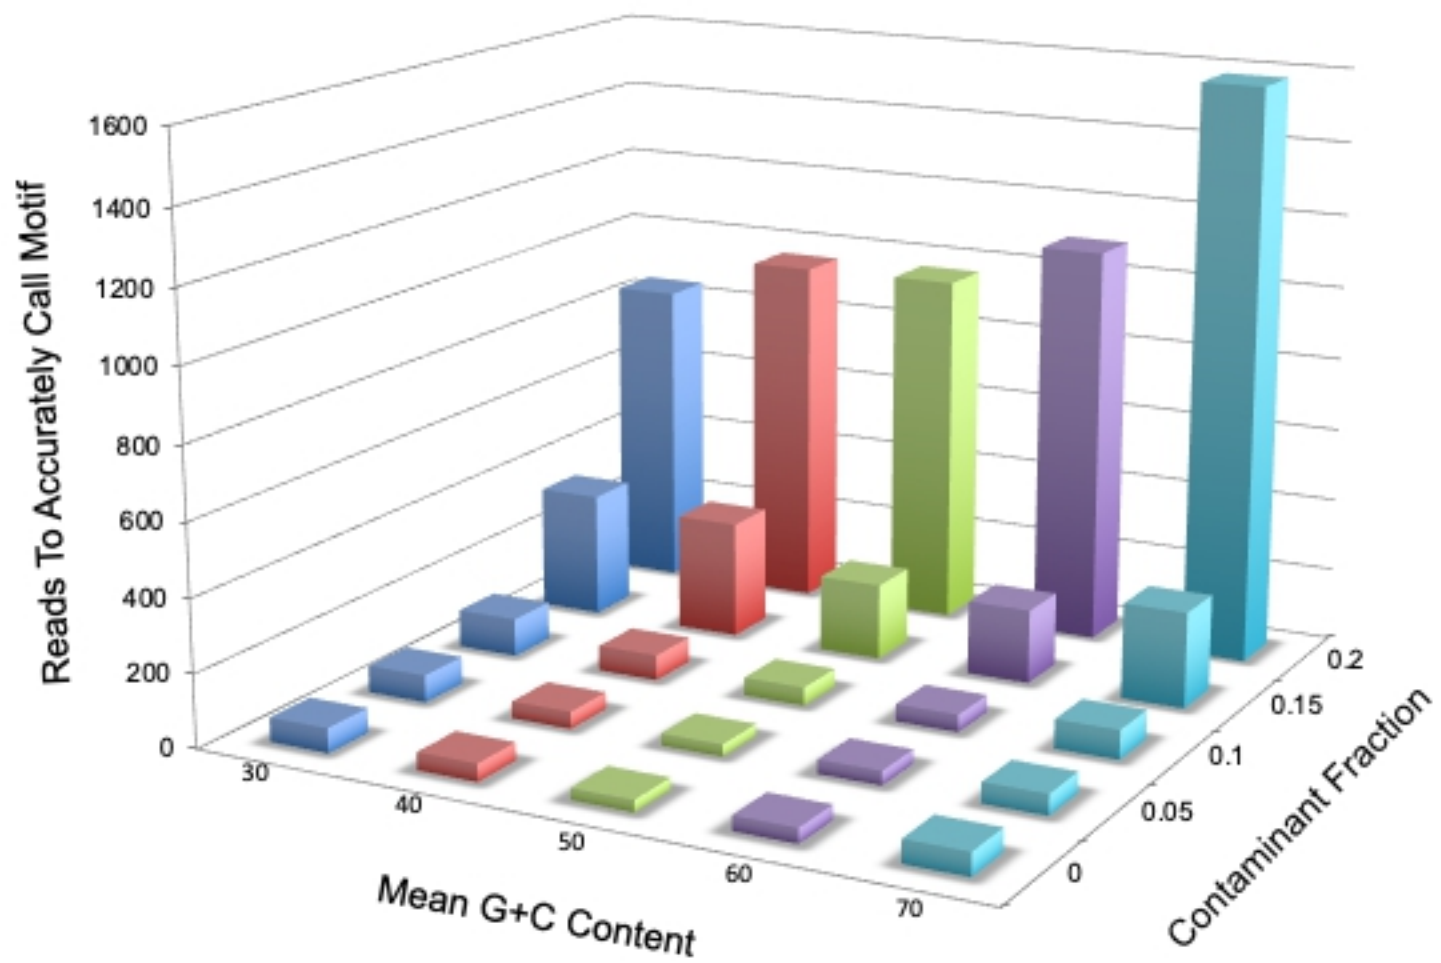

Figure 4
